# Supplementary material for: Infiltrating Myeloid Cells Drive Osteosarcoma Progression via GRM4 Regulation of IL23
Source: Oxford University Press journal article supplement (doi:10.1158/2159-8290.cd-19-0154), 2019-09-16
Supplement: 21598290cd190154-sup-216627_2_supp_5637102_p99np7.docx [file 21598290cd190154-sup-216627_2_supp_5637102_p99np7.docx]

Supplementary Materials for

**This PDF file includes:**

Figs. S1 to S16

Tables S1 to S2


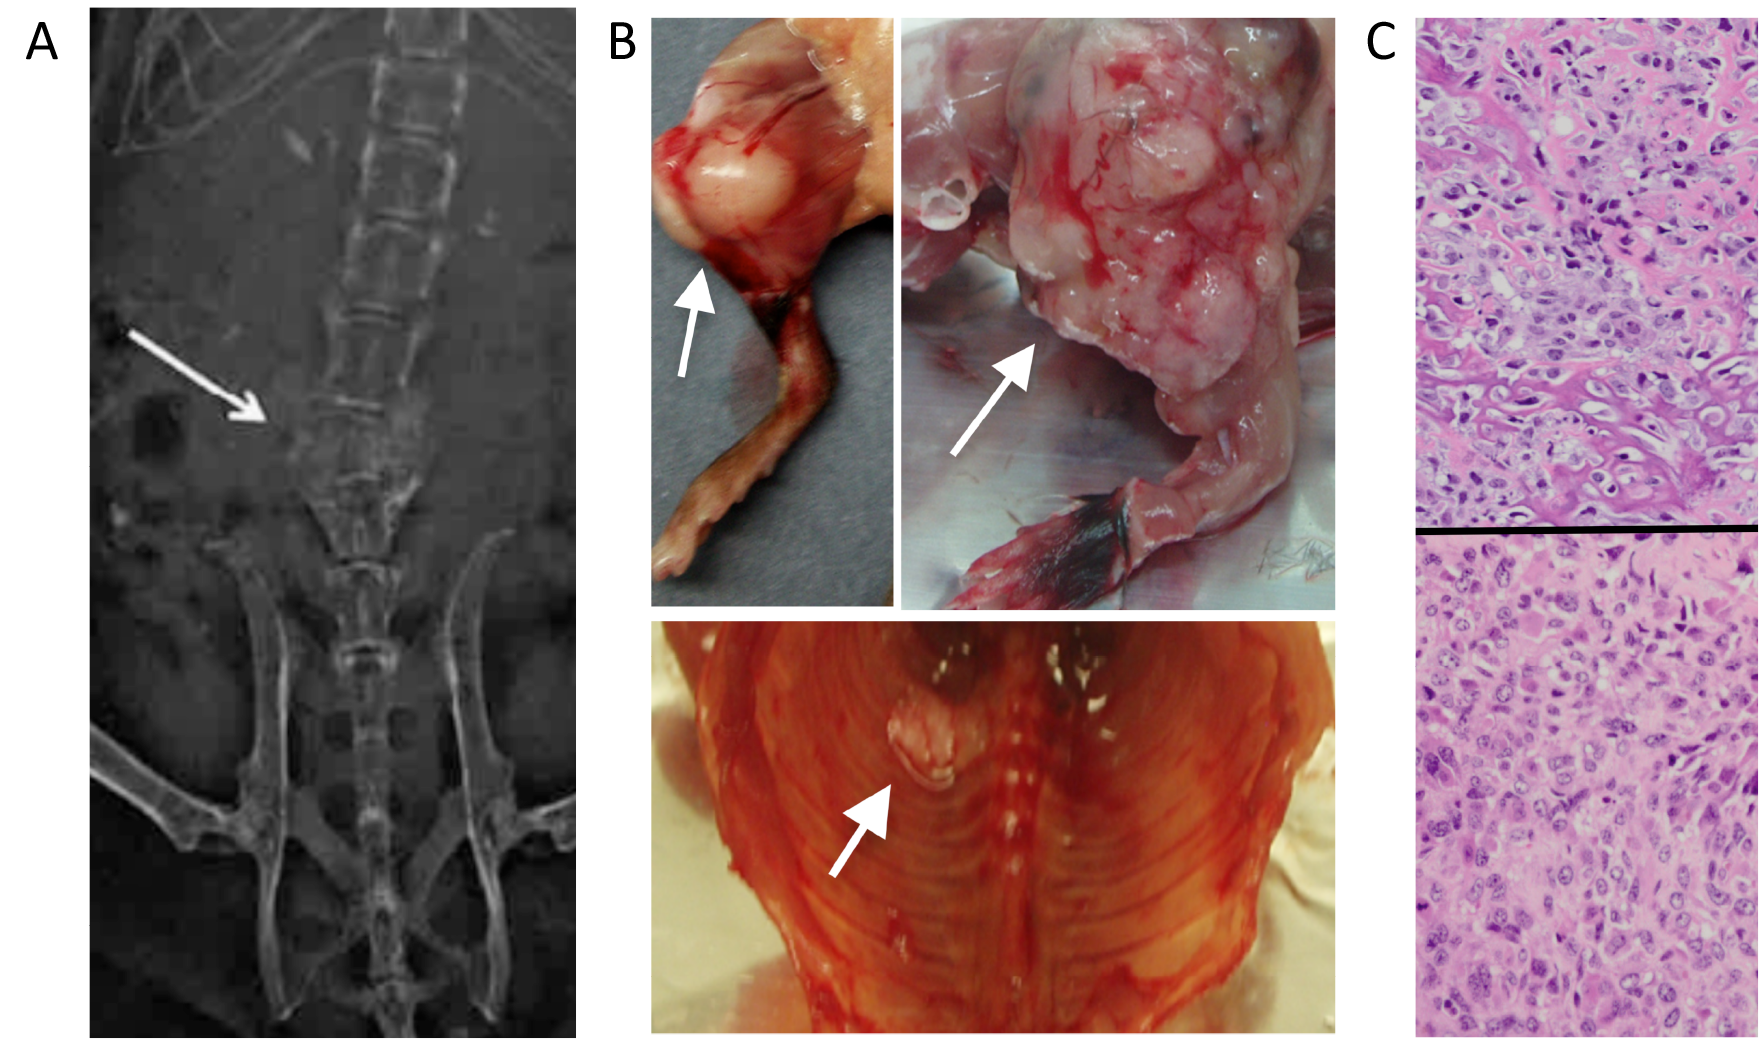


Fig. S1. 45Ca-induced osteosarcomas, gross morphology and histology. (A) Faxitron X-ray radiography, arrow indicates location of osteosarcoma in spine. (B) Gross morphology of tumors in hind limb, shoulder and ribs (arrows). (C) Gross histology of two 45Ca-induced tumors showing osteiod as an ananstomosing network of trabeculae (light pink), some of which is mineralized (dark pink) and is filled up in the spaces with tumor cells.


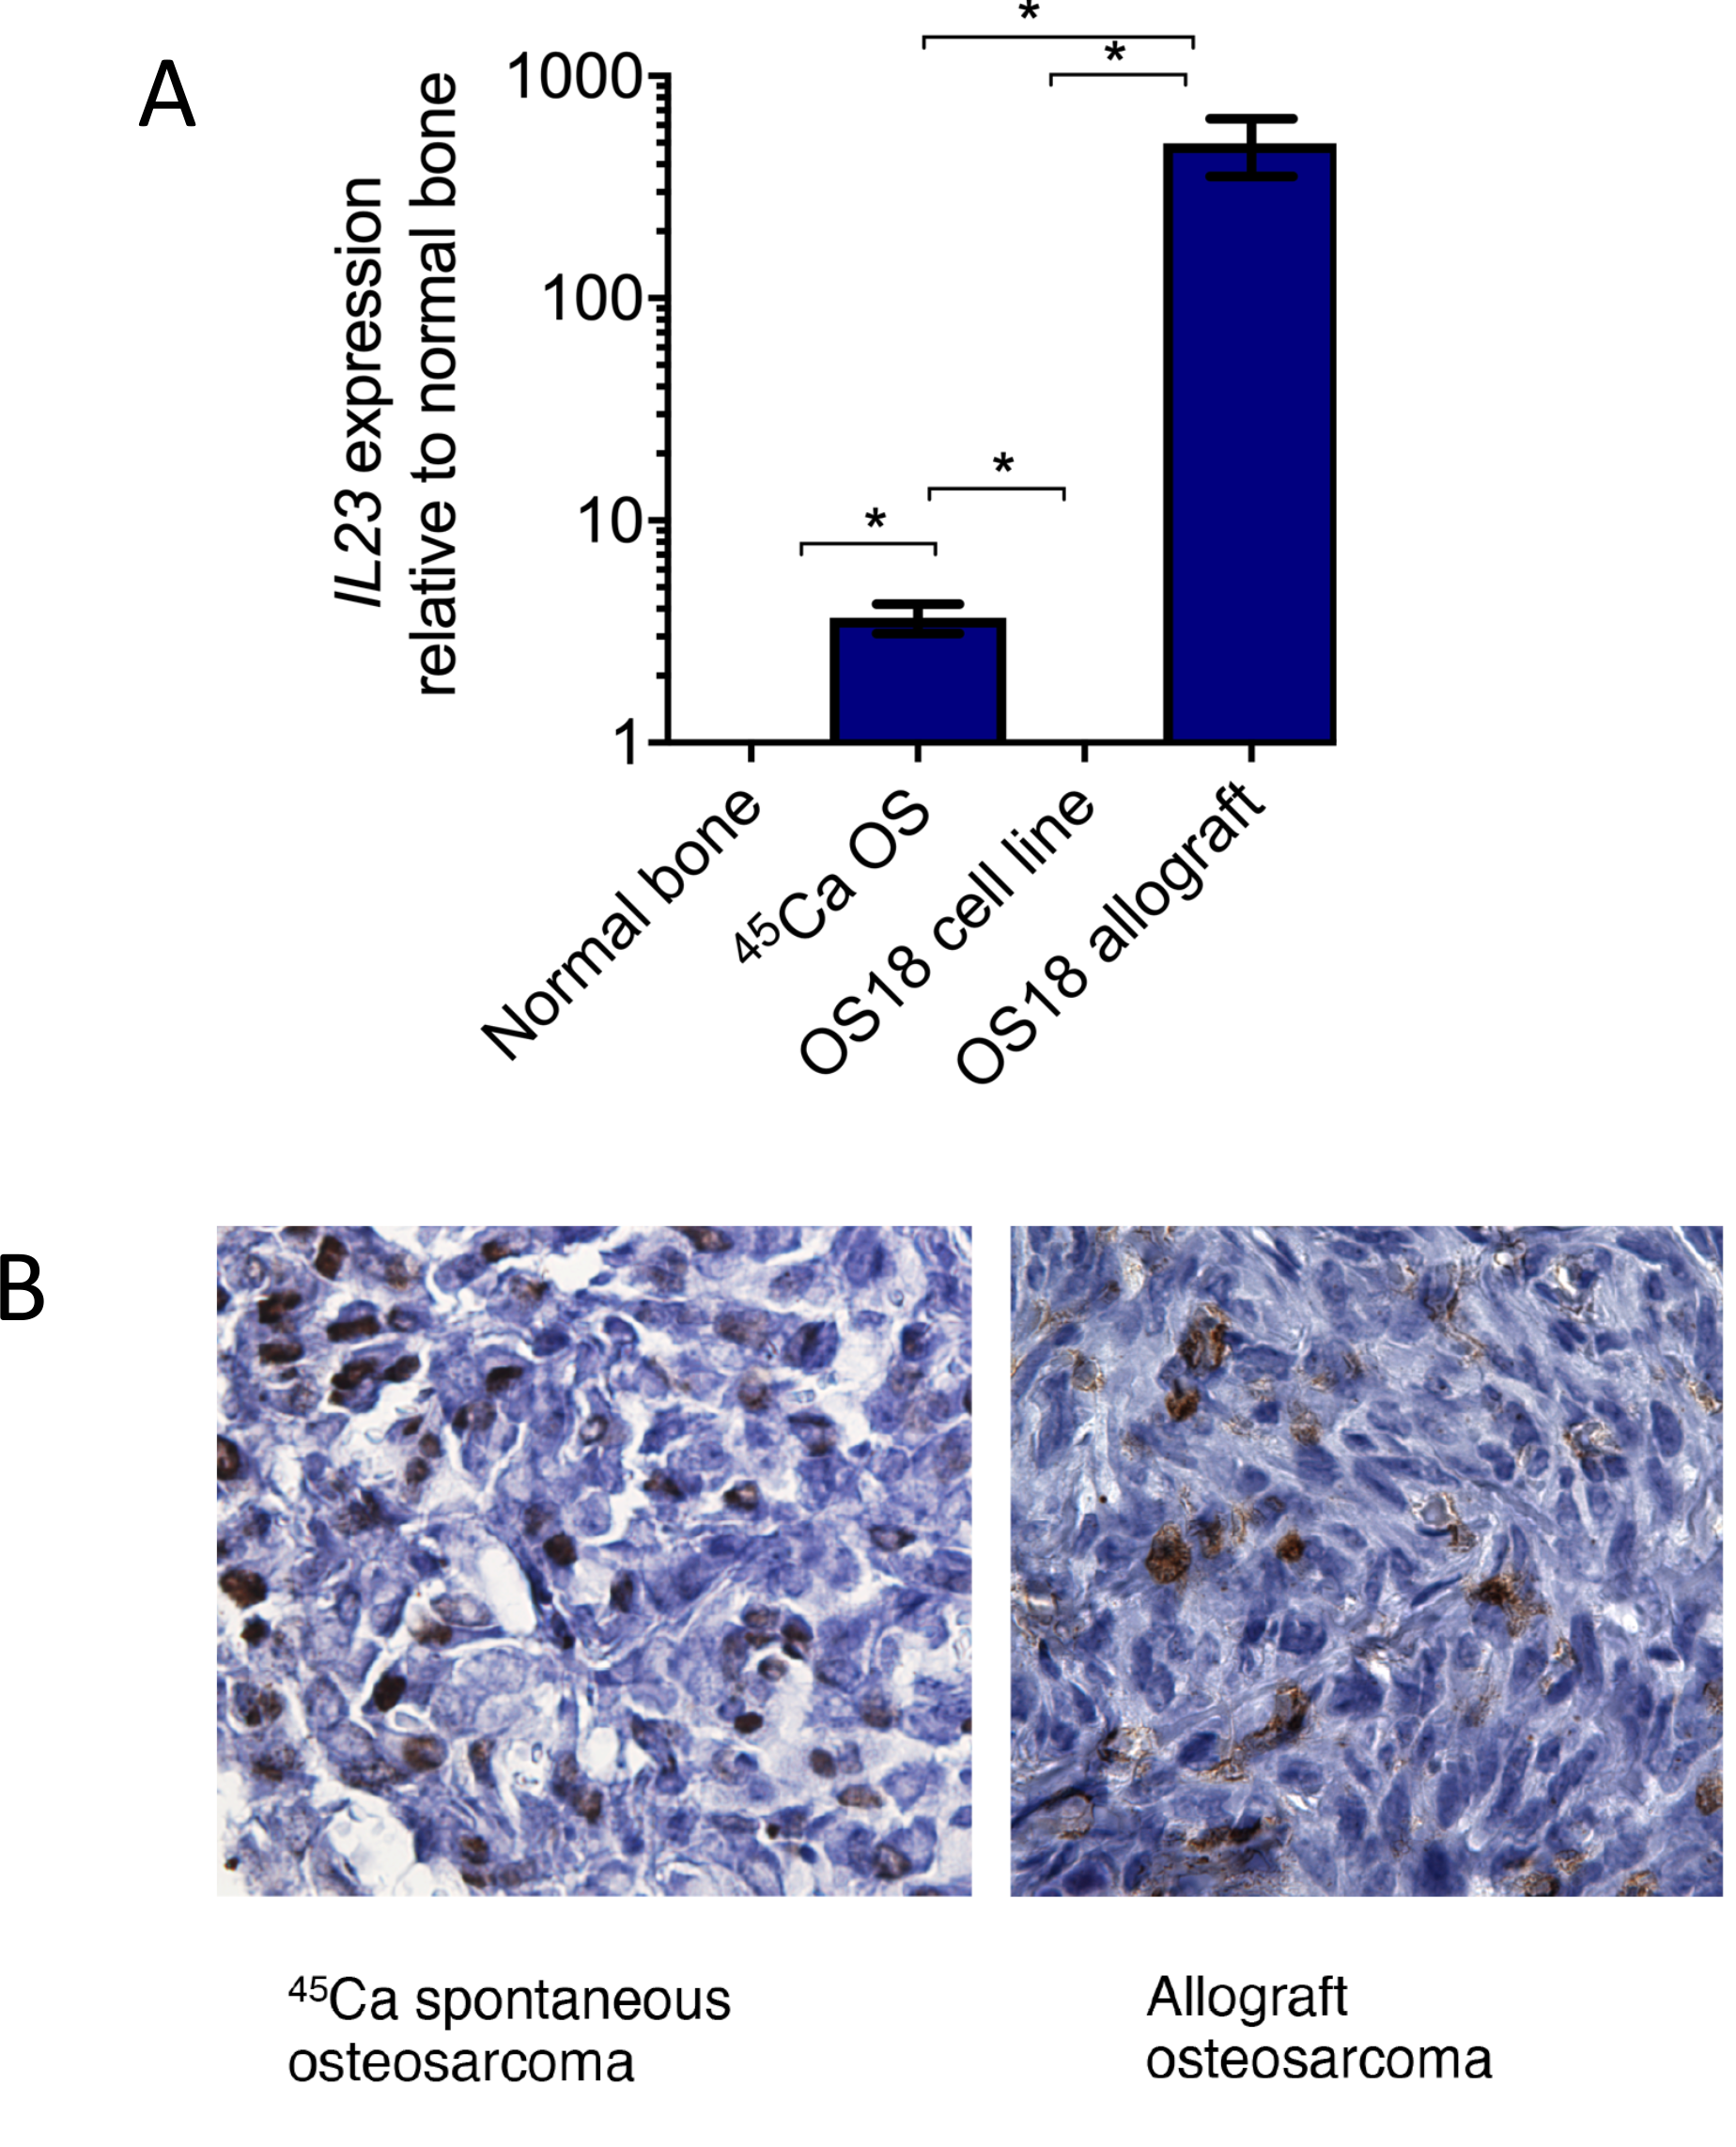


**Fig. S2*. Il23* is expressed by cells in the tumor microenvironment (A)** *Il2*3 (p19) levels in normal bone, 45Ca-induced primary osteosarcoma, cultured osteosarcoma cell lines OS18 and tumor following implantation of OS18 cells, qRT-PCR as described in methods. Data are means ± SEM, Representative of three independent experiments. (**B**) *Il23 (*p19) *In situ* hybridisation in 45Ca-induced spontaneous and allograft WT tumors, showing focal staining IL23A in cells within tumors, X20 magnification. Representative images are shown.


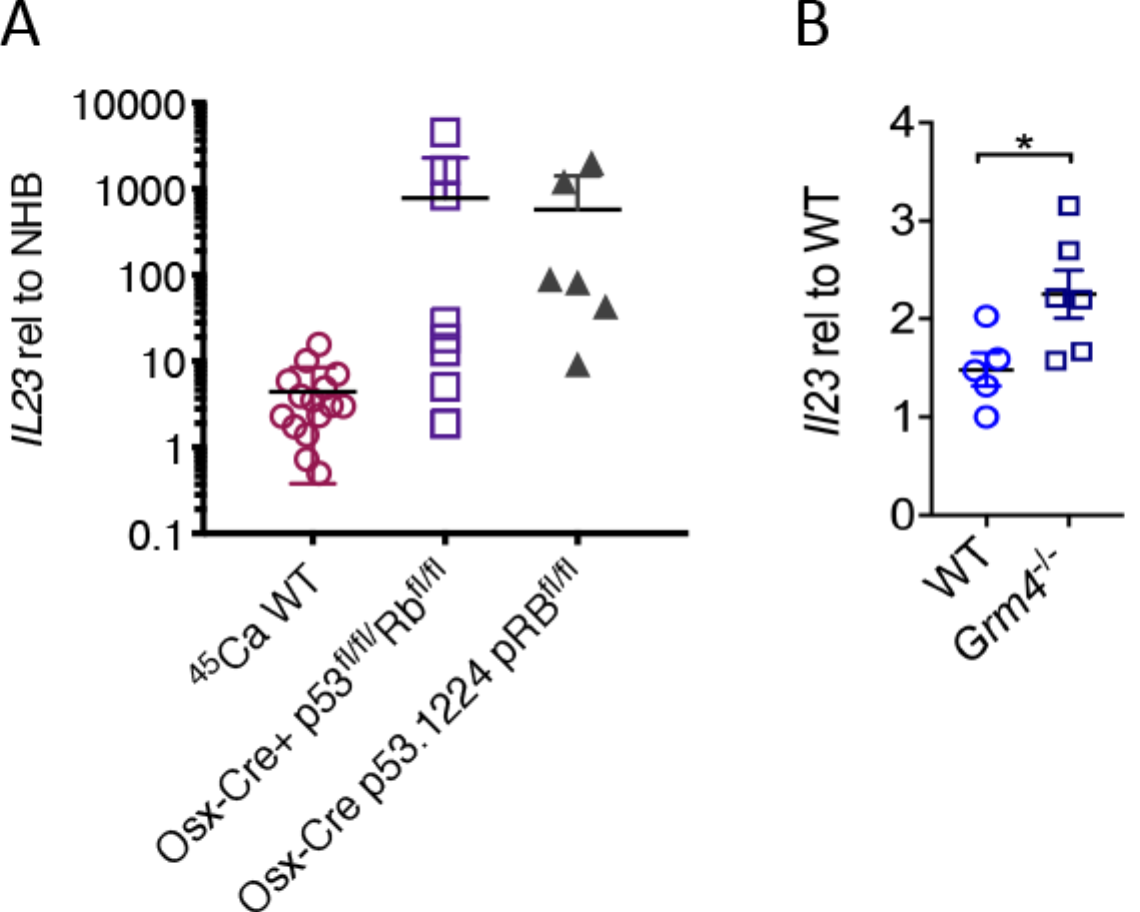


**Fig. S3 *IL23* expression in mouse tumors (**A) Osteosarcomas derived from both 45Ca radiocarcinogen and genetically engineered mouse models have higher *Il23* compared to normal bone. *Il23* was measured using qRT-PCR in 45Ca-induced tumors (*n=14*), Osx-Cre +p53fl/fl pRBfl/fl (*n=9*) and *Osx-Cre +p53fl/fl pRBfl/fl*(*n=9*) and *Osx-Cre p53 1224* pRbfl/fl tumors (*n=*6) (20). (B) 45Ca radiation induced osteosarcomas from *Grm4-/-* mice (*n=5*) have higher expression of *Il23* compared to WT control tumors (*n=6*), *P*=0.0358). *Il23* was measured using qRT-PCR.


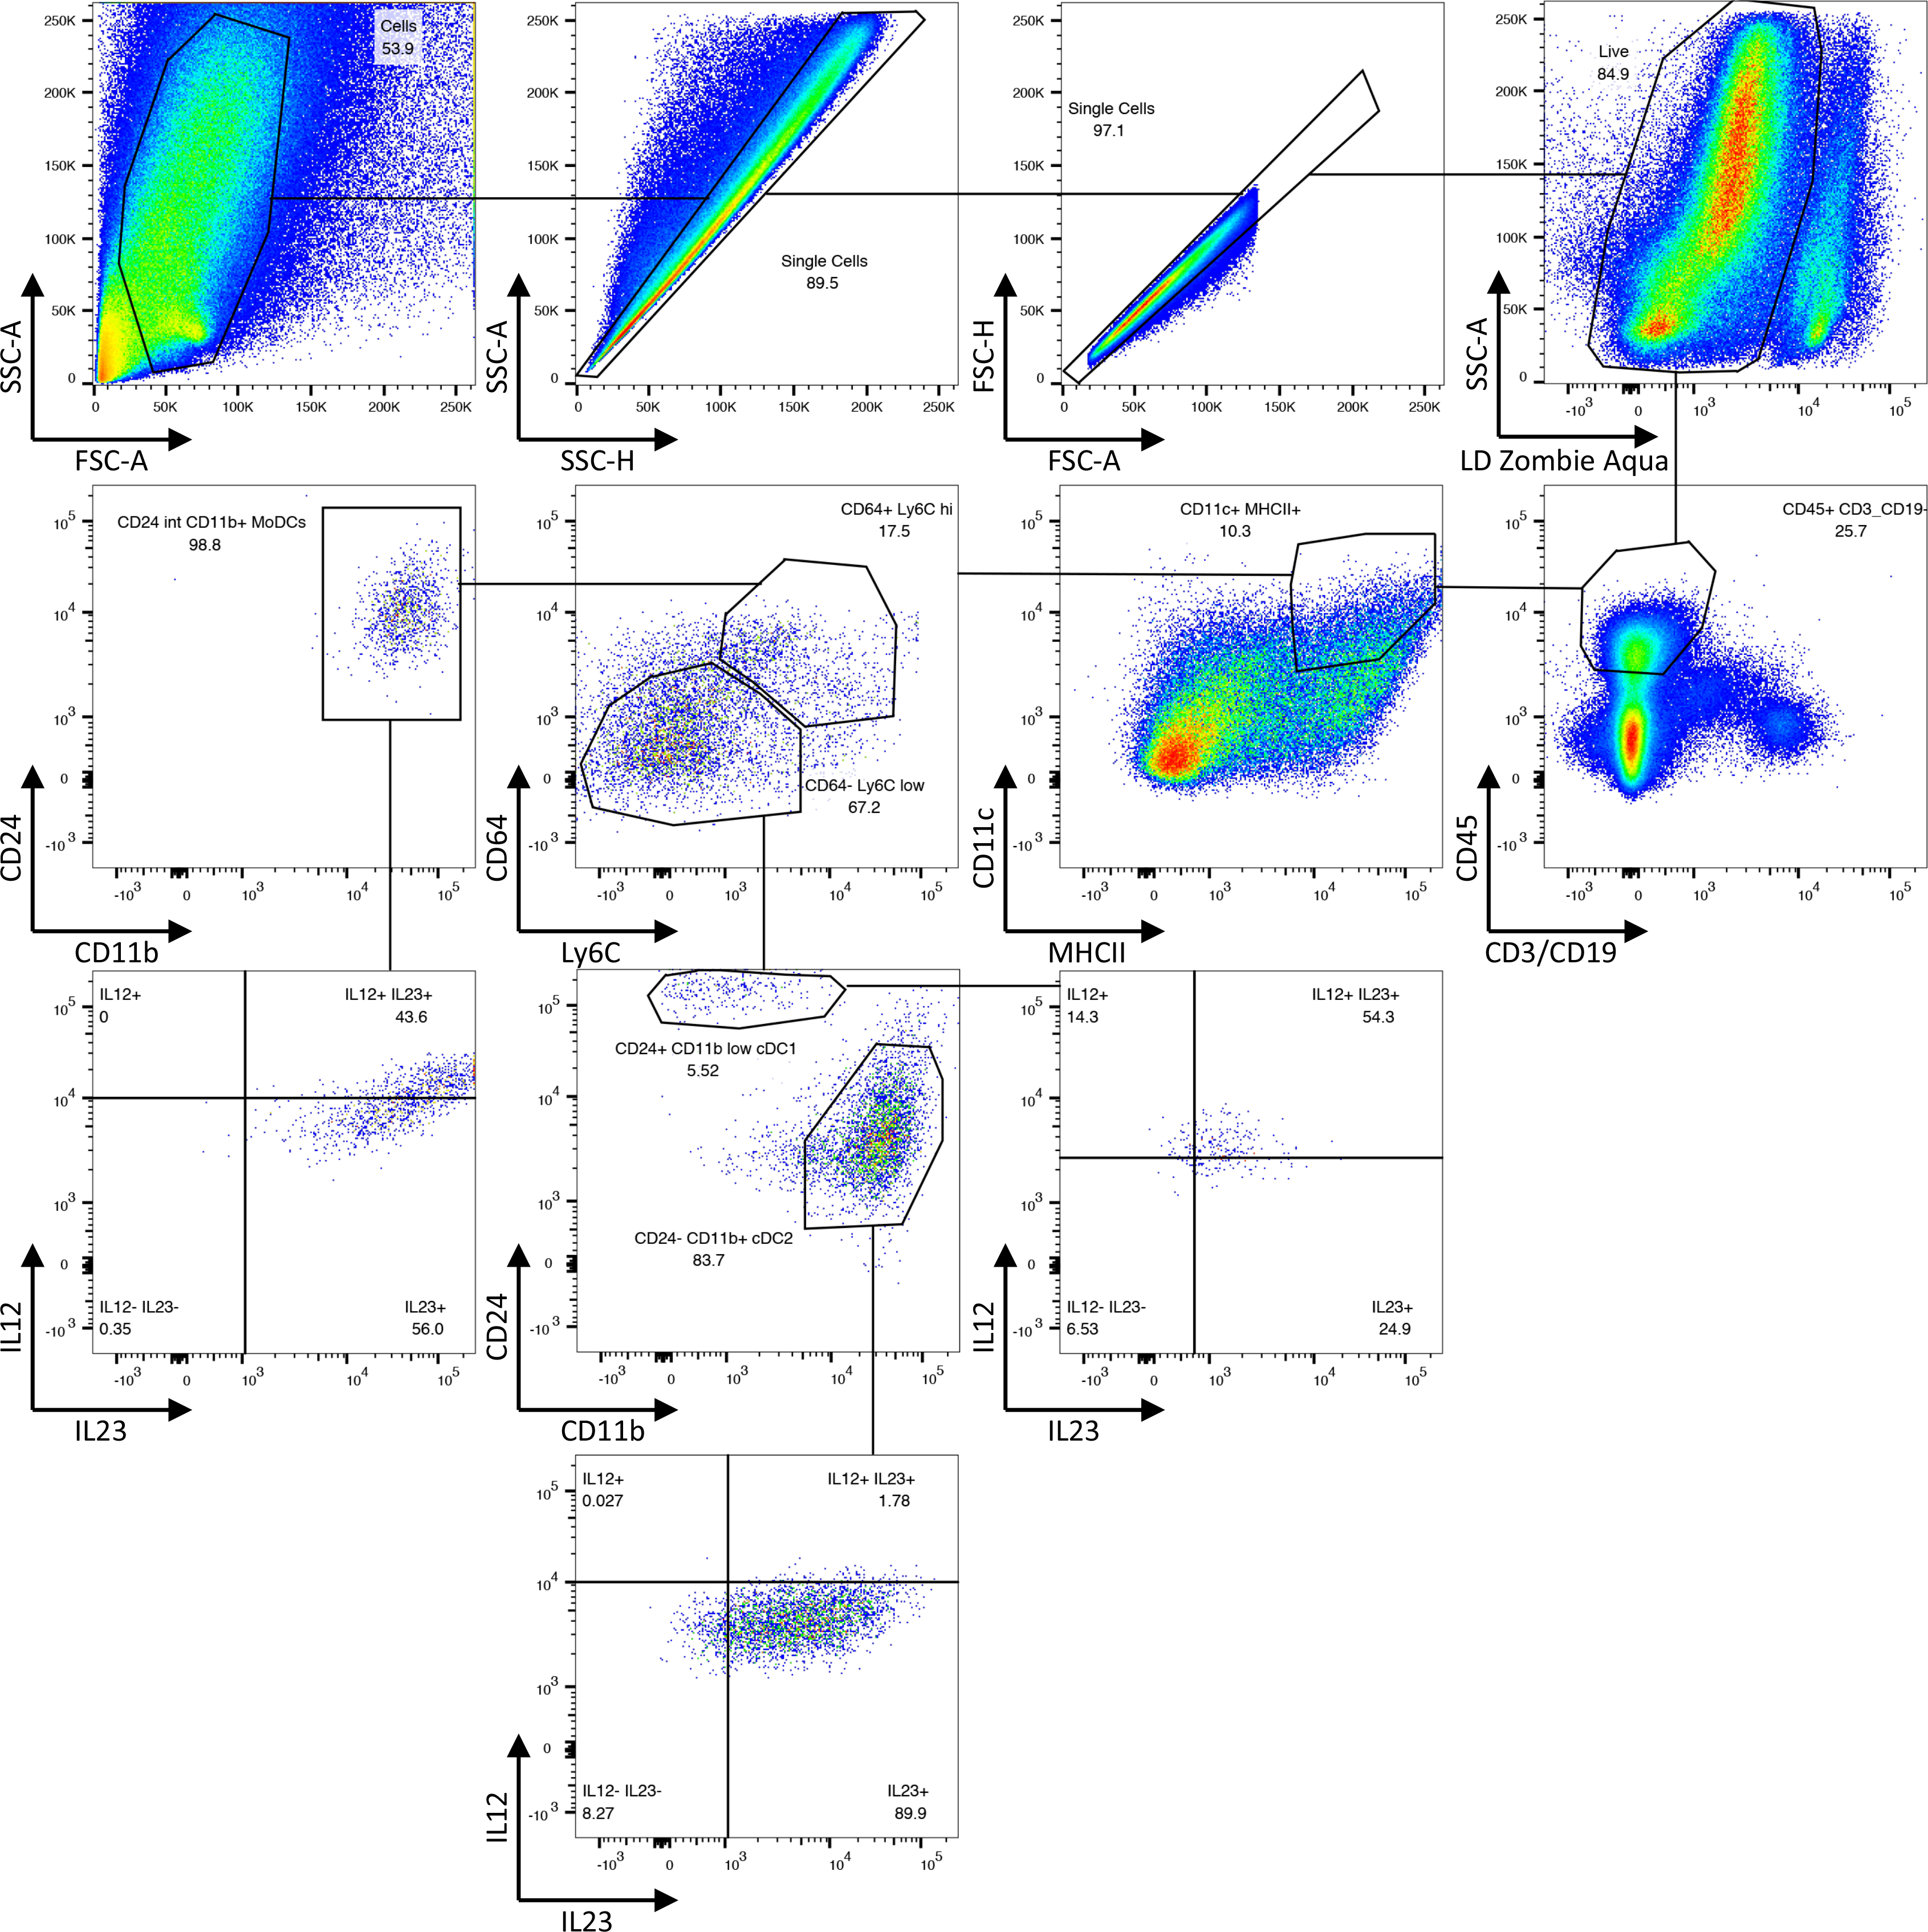


**Fig. S4. Gating strategy shown for monocyte DCs**, Cells, single cells, single SSC, MHCII+, CD11c+, Ly6c hi, CD64+, CD24int, CD11b+,Gating strategy for cDC1 and cDC2Dc subsets Cells, single cells, single SSC, MHCII+, CD11c+ , not shown but gating for cDC1 included (Ly6Clow, CD64-, CD24+, CD11blow) , cDC2 (Ly6Clow, CD64-, CD24-, CD11b+), gating strategy (15).


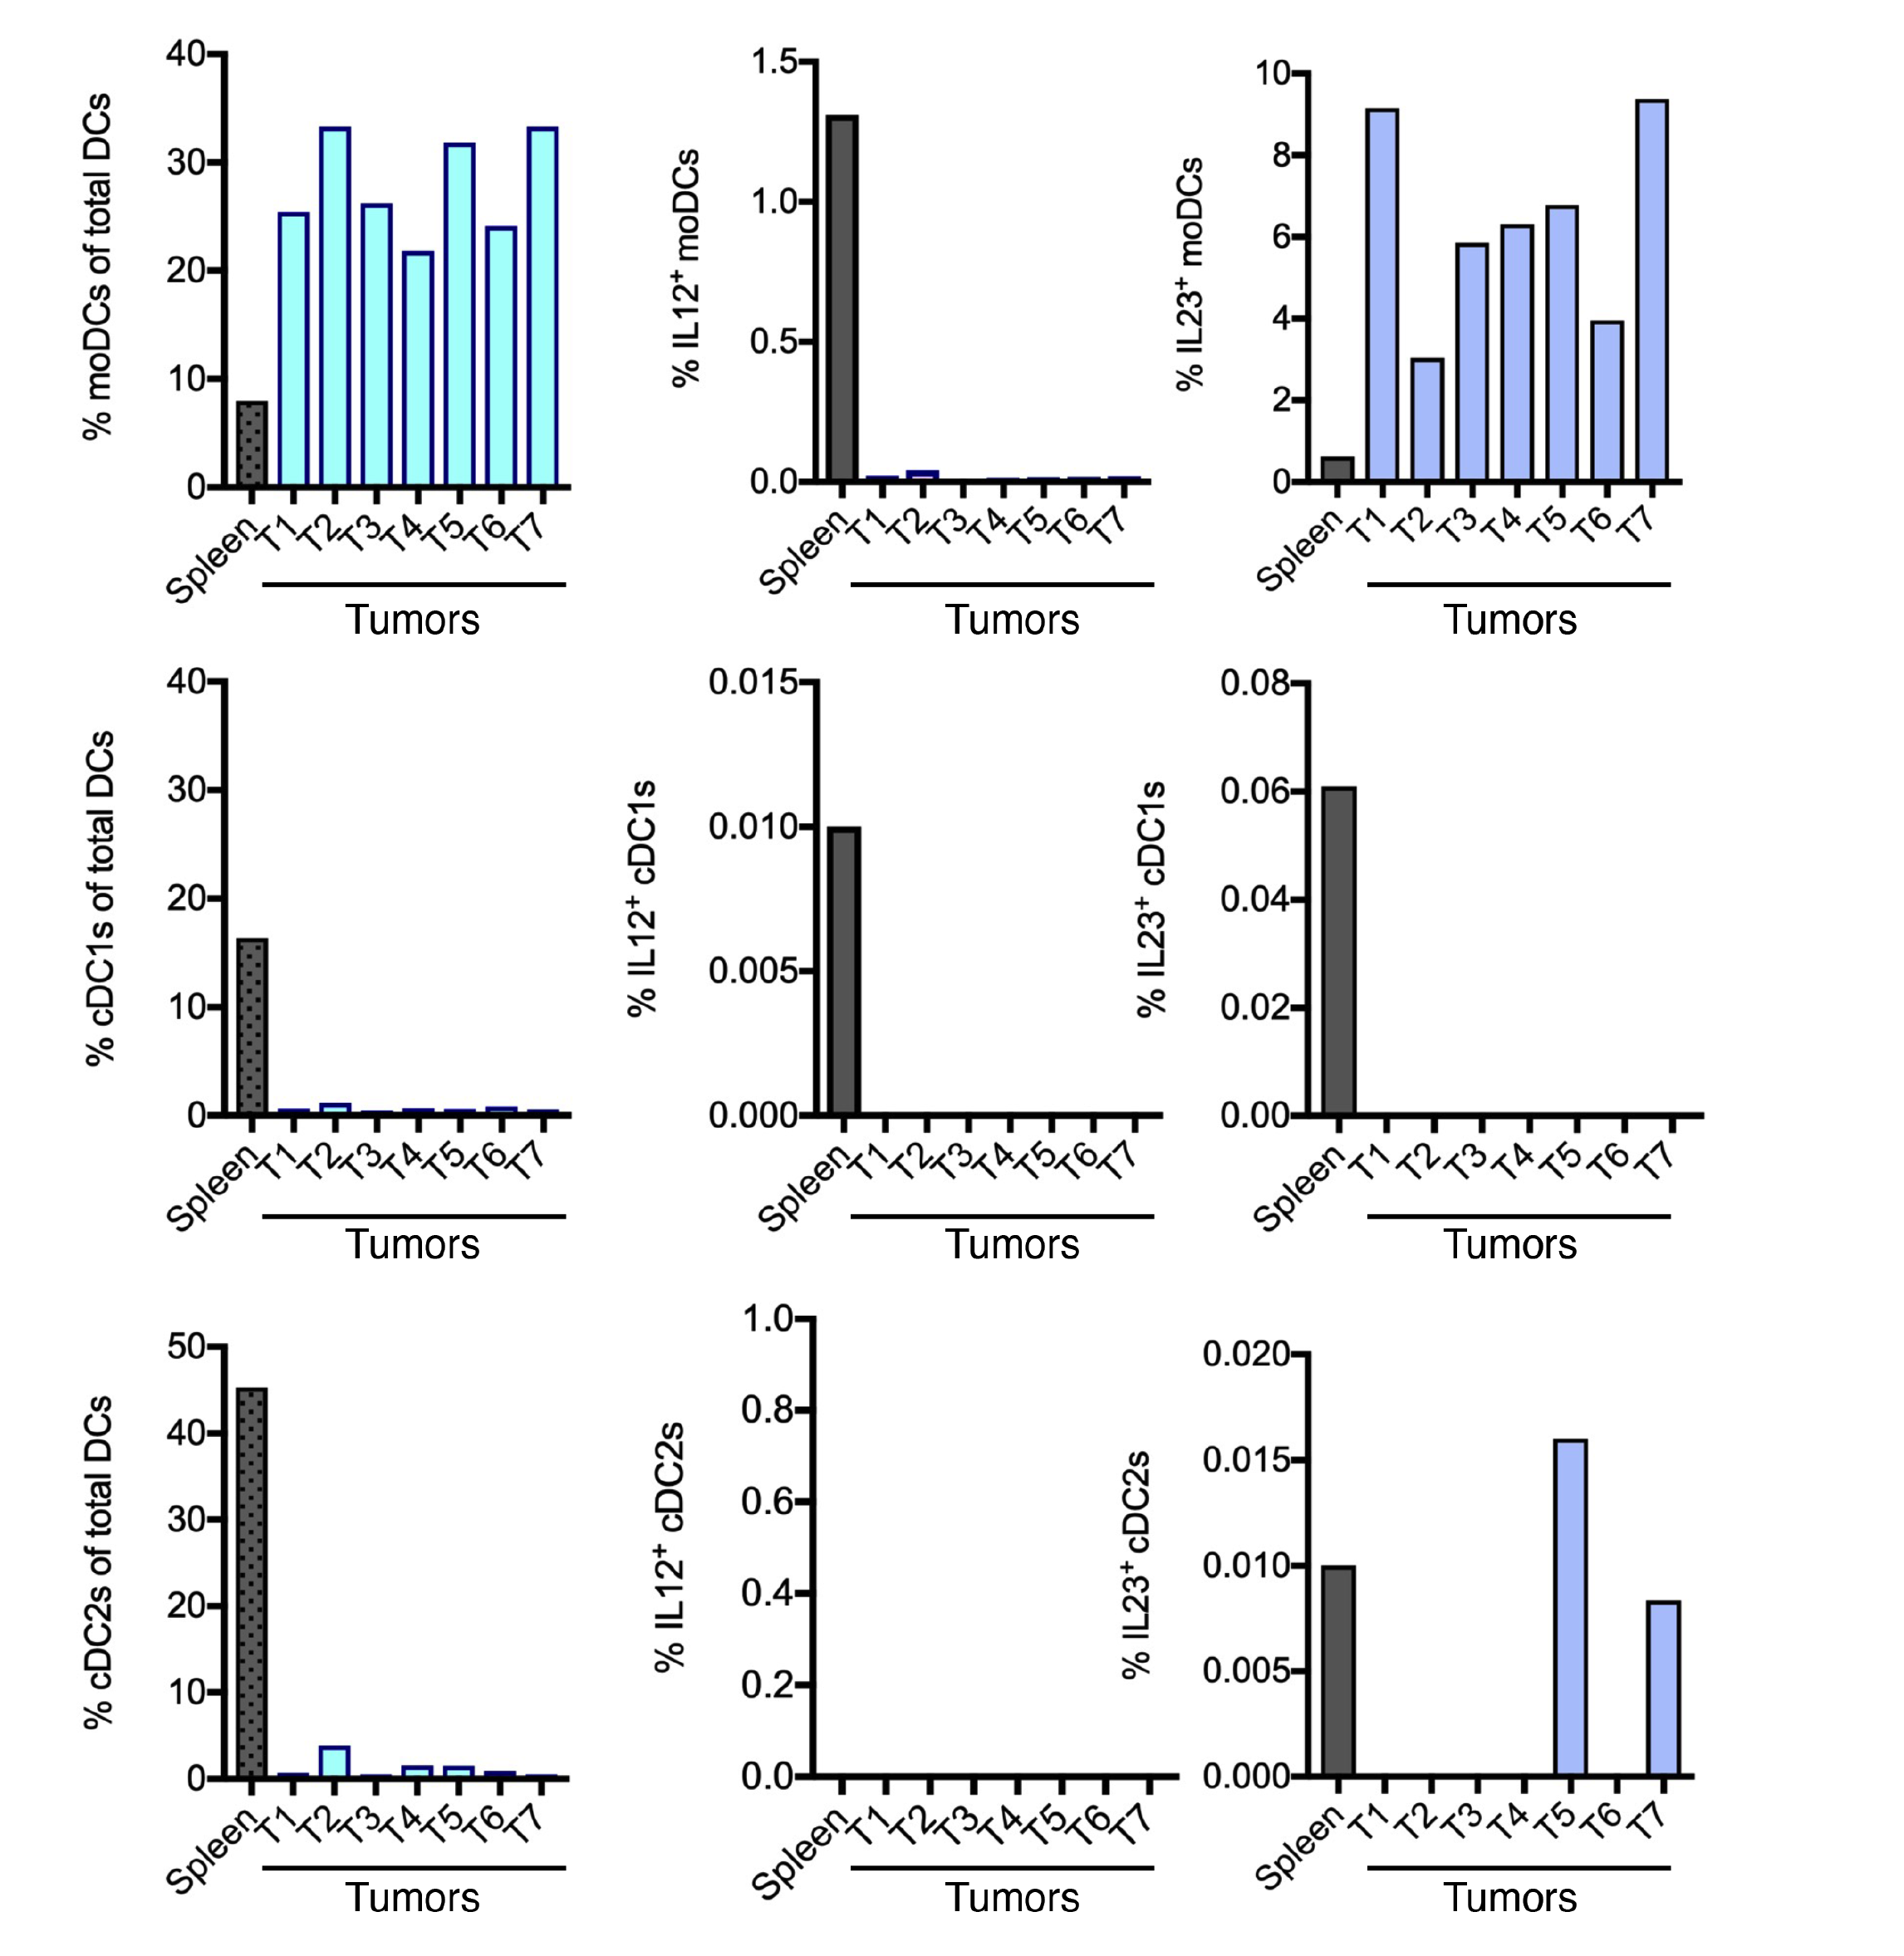


**Fig. S5. Predominant source of IL23 is from tumor infiltrating MoDCs.** MoDCs express IL23 in the mouse tumor environment (gating strategy Fig. S4). Flow cytometry of infiltrating immune cells and intracellular cytokine expression in WT OS18 allograft tumors identify MoDCs expressing IL23 with limited IL12 expression in the tumor microenvironment. Seven independent tumors compared to MoDC isolated from spleen.

**
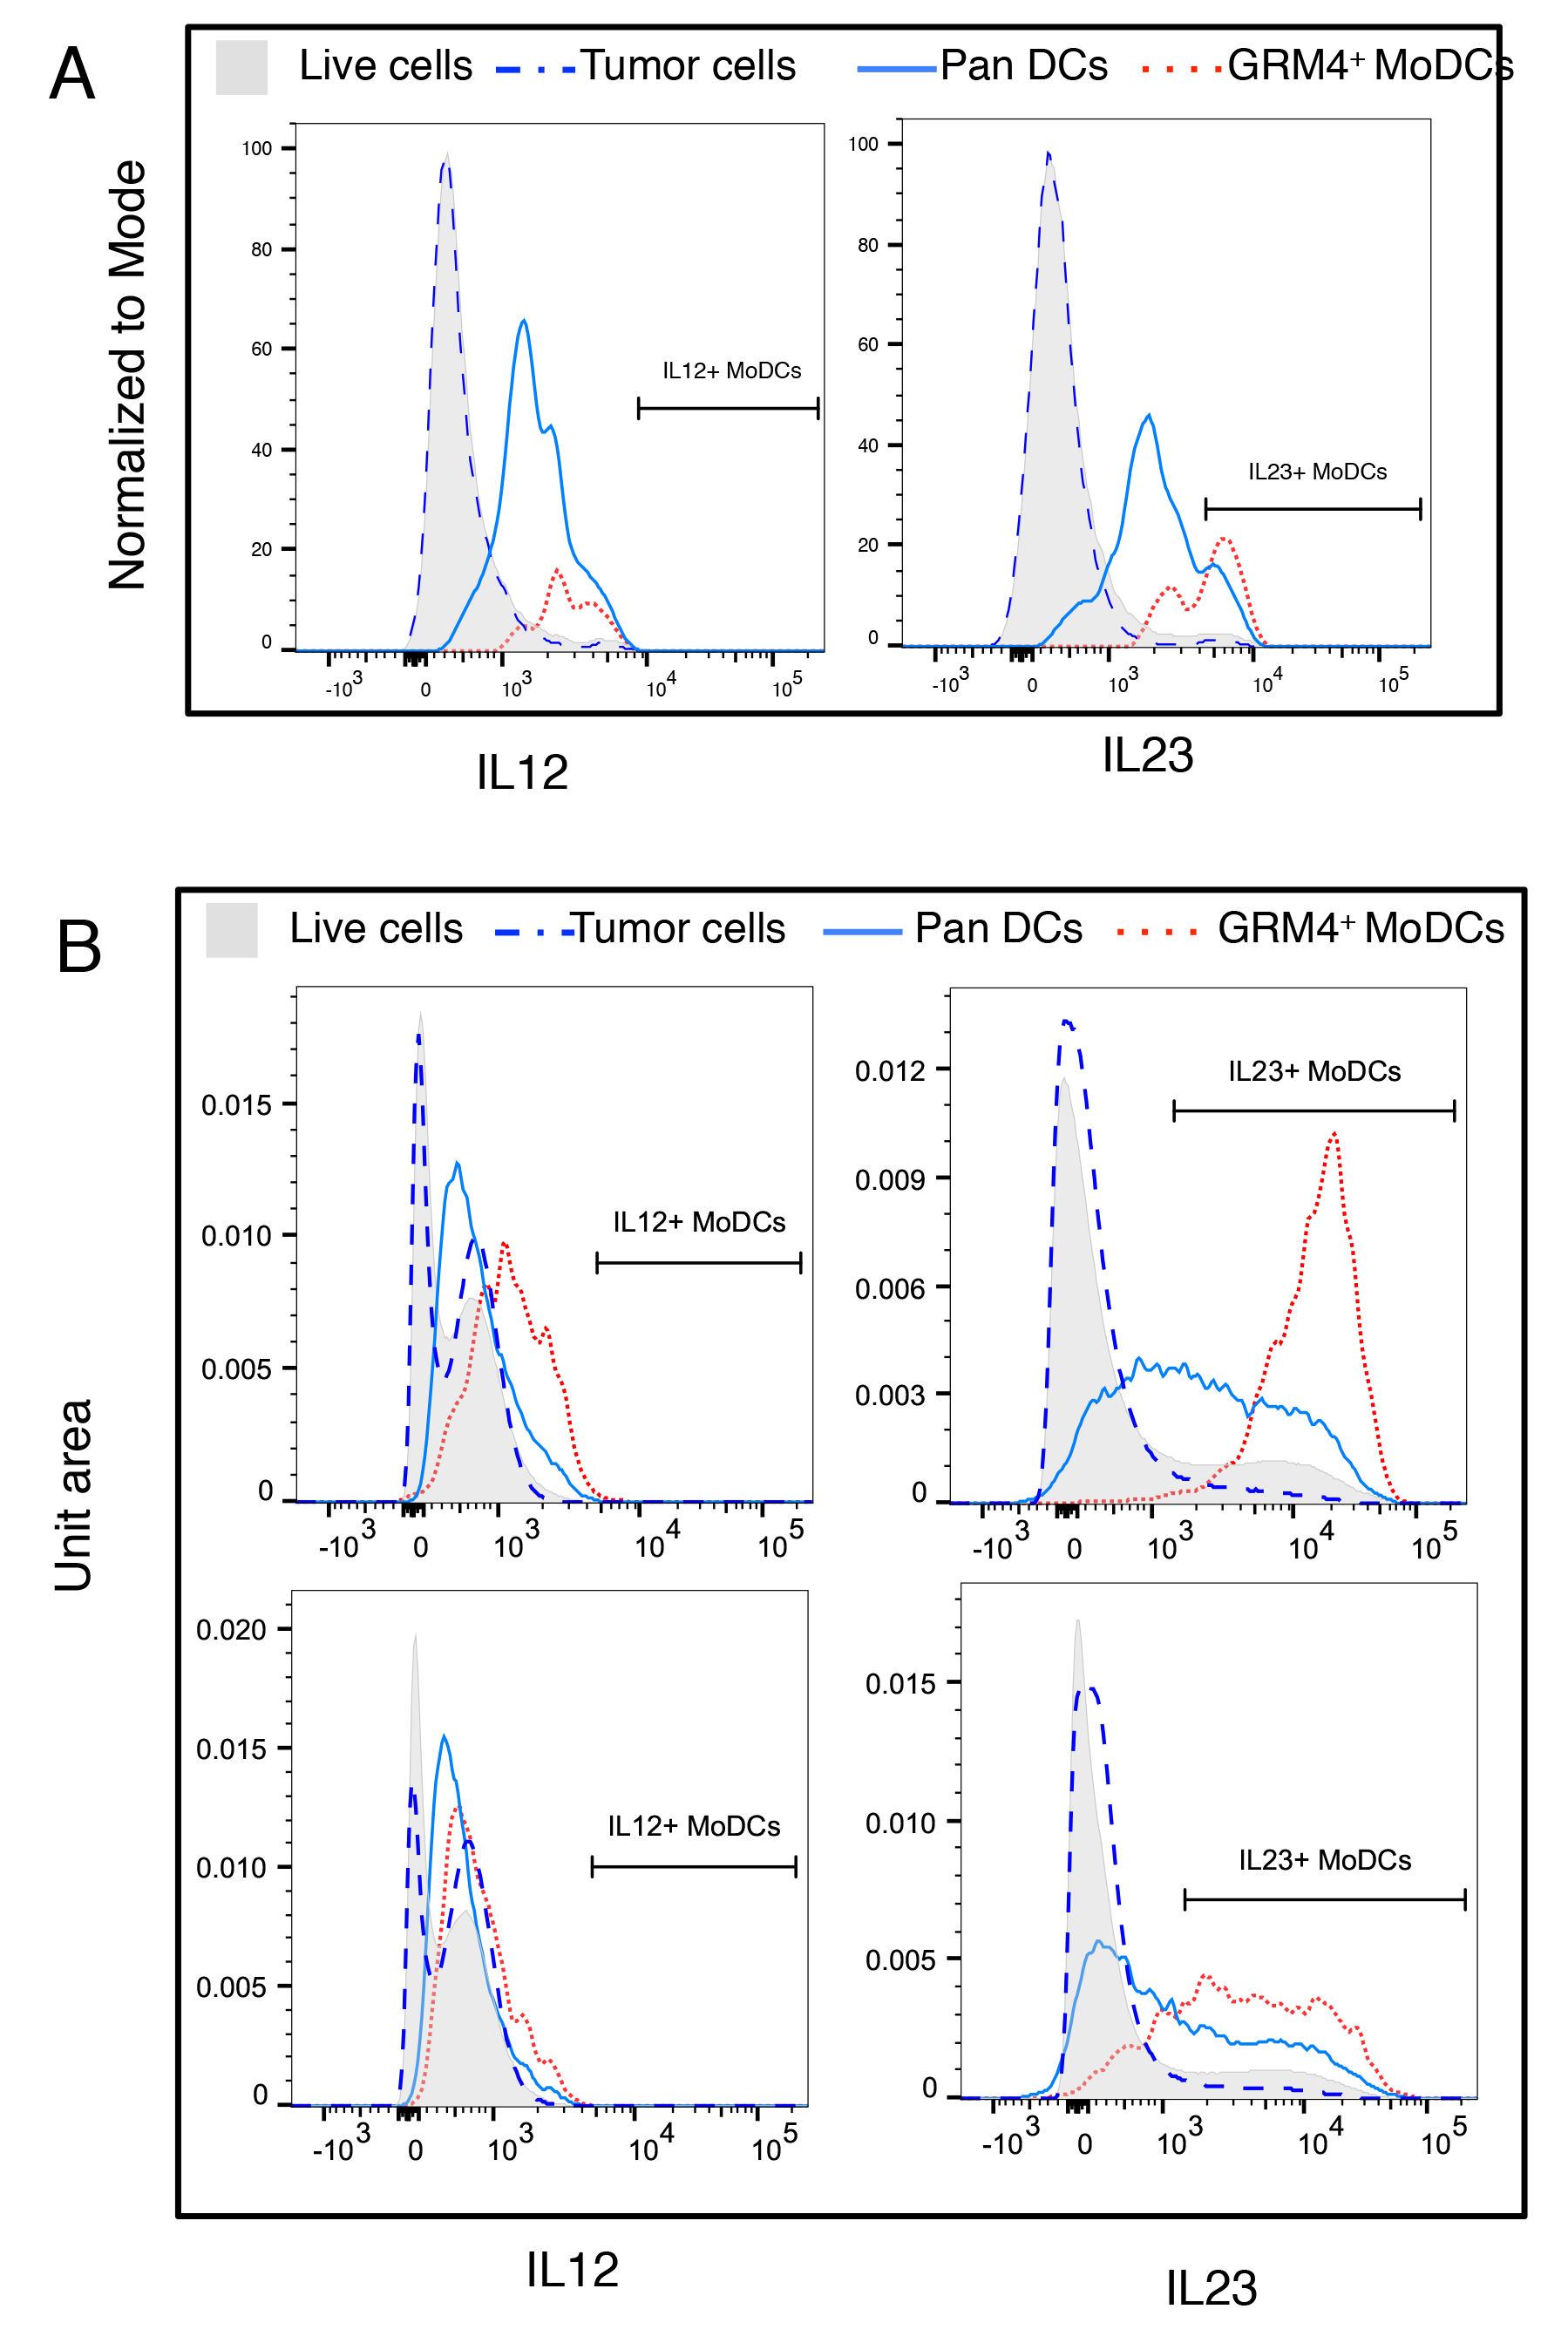
**

**Fig. S6. Predominant source of IL23 is from tumor infiltrating GRM4+MoDCs. (A**) Flow cytometry analysis of 45Ca WT osteosarcoma (gating strategy Fig. S4) showing MoDcs GRM4+ cells expressing IL23. (B) Flow cytometry analysis of two K7M2 osteosarcomas similar to A. For all the cross bar shows gating for IL12 or IL23 FMO defining positive cytokine staining cells.


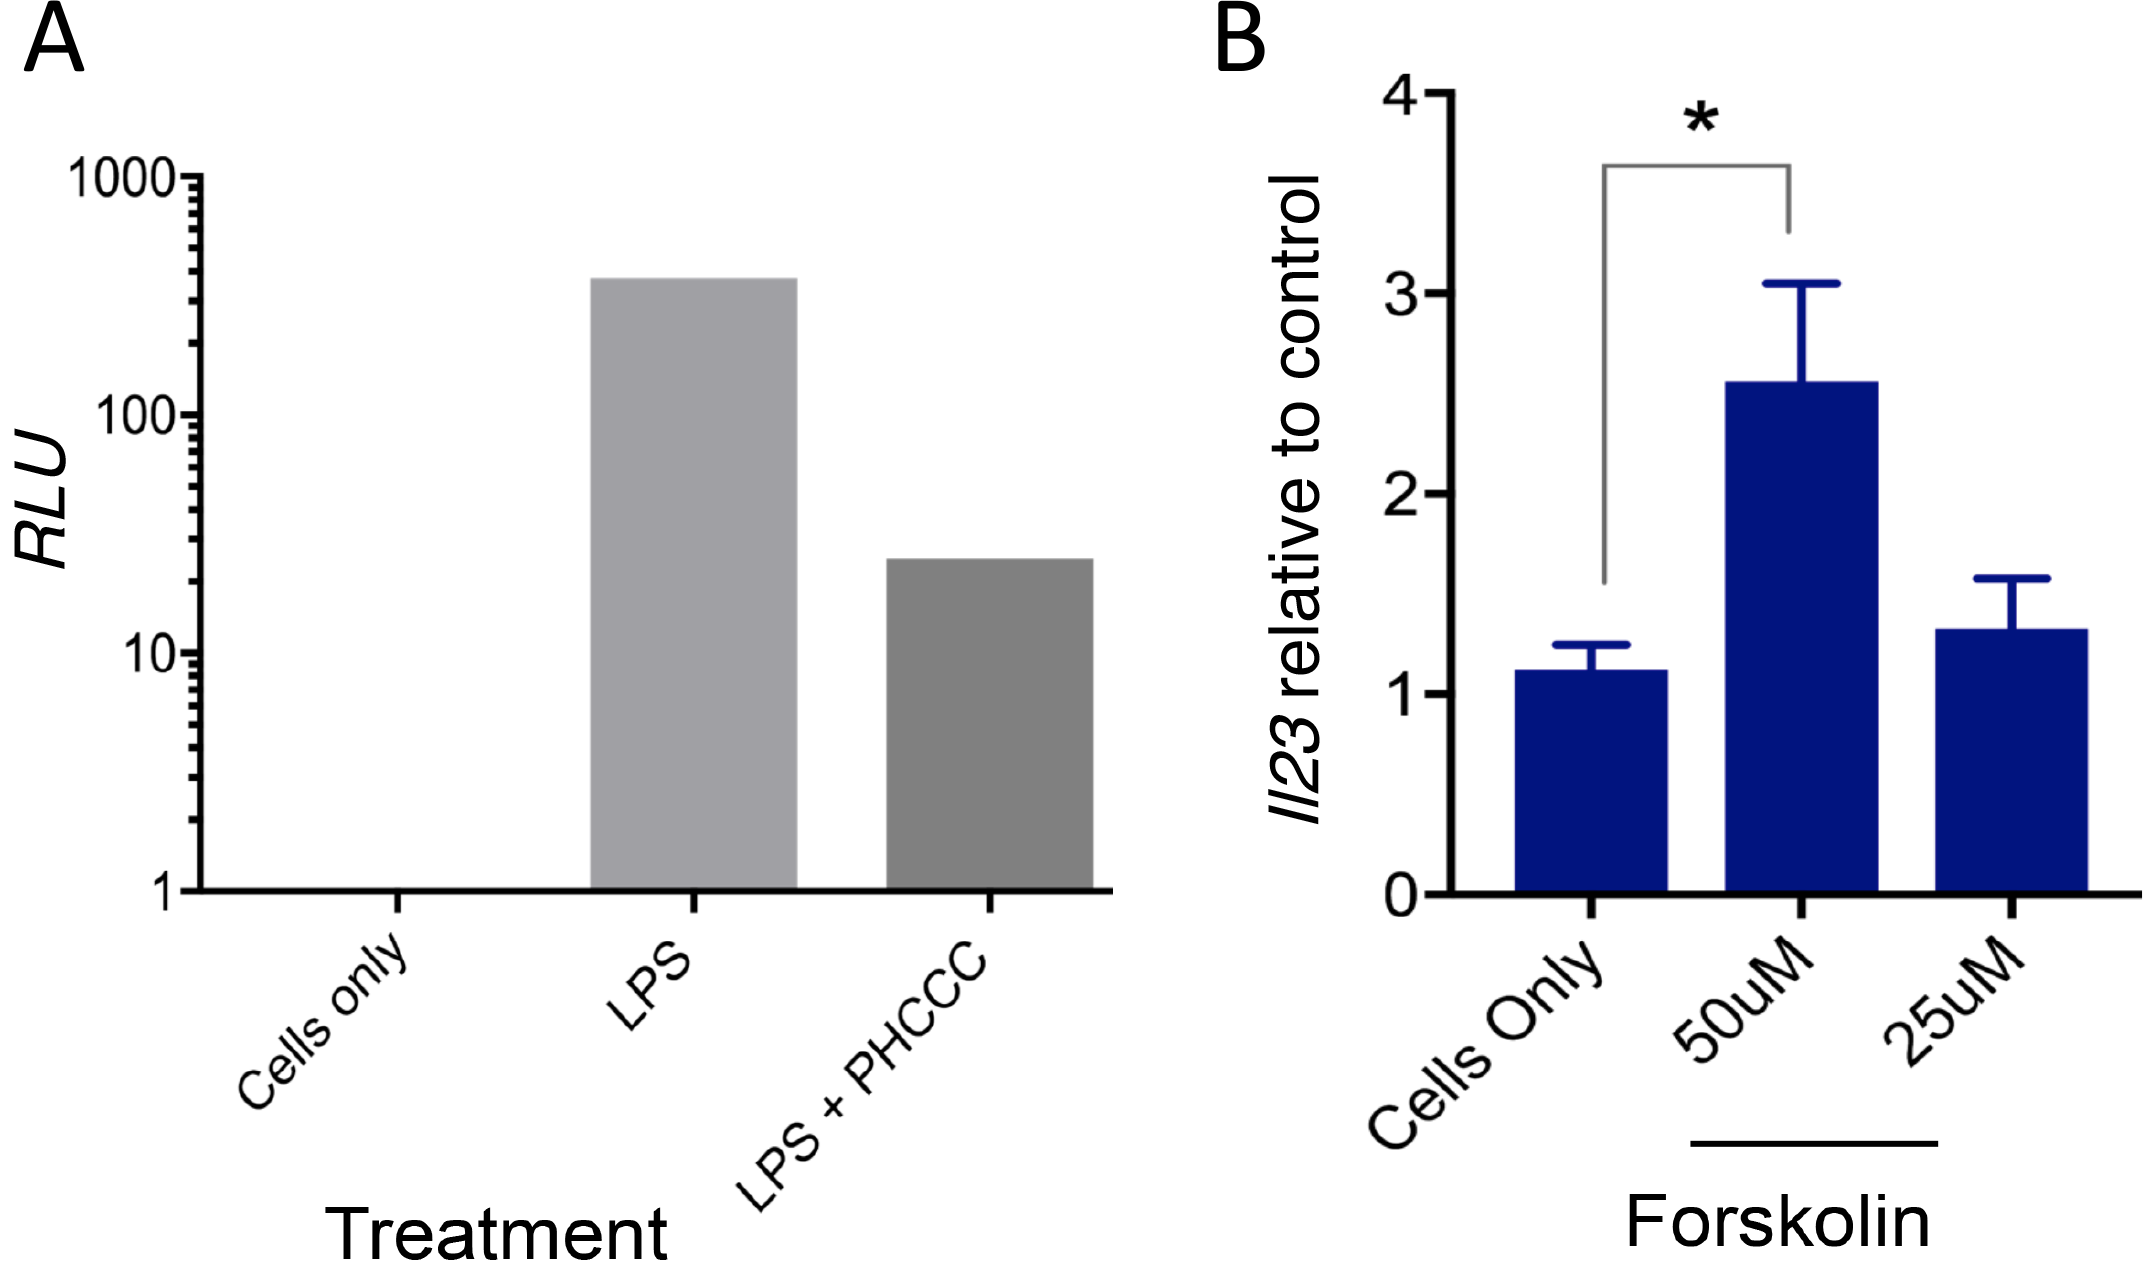


**Fig. S7. GRM4 signaling controls cAMP formation and IL23 expression.** **(A) Intracellular cAMP levels are down-regulated following treatment with PHCCC.** Intracellular cAMP was measured using the cAMP-Glo assay (Promega cat # V1501). Myeloid cells enriched for DCs were (1.3 x 106 ) were pre incubated in Locke’s solution containing 0.5 mm isobutyl methylxanthine. (glutamate free), pH 7.4 and treated with LPS 1 mg/ml ± PHCCC 40 uM and cAMP measured. **(B)** Forskolin an inducer of cAMP increases IL23A transcript levels at 50 mM (*P=0.0150*).


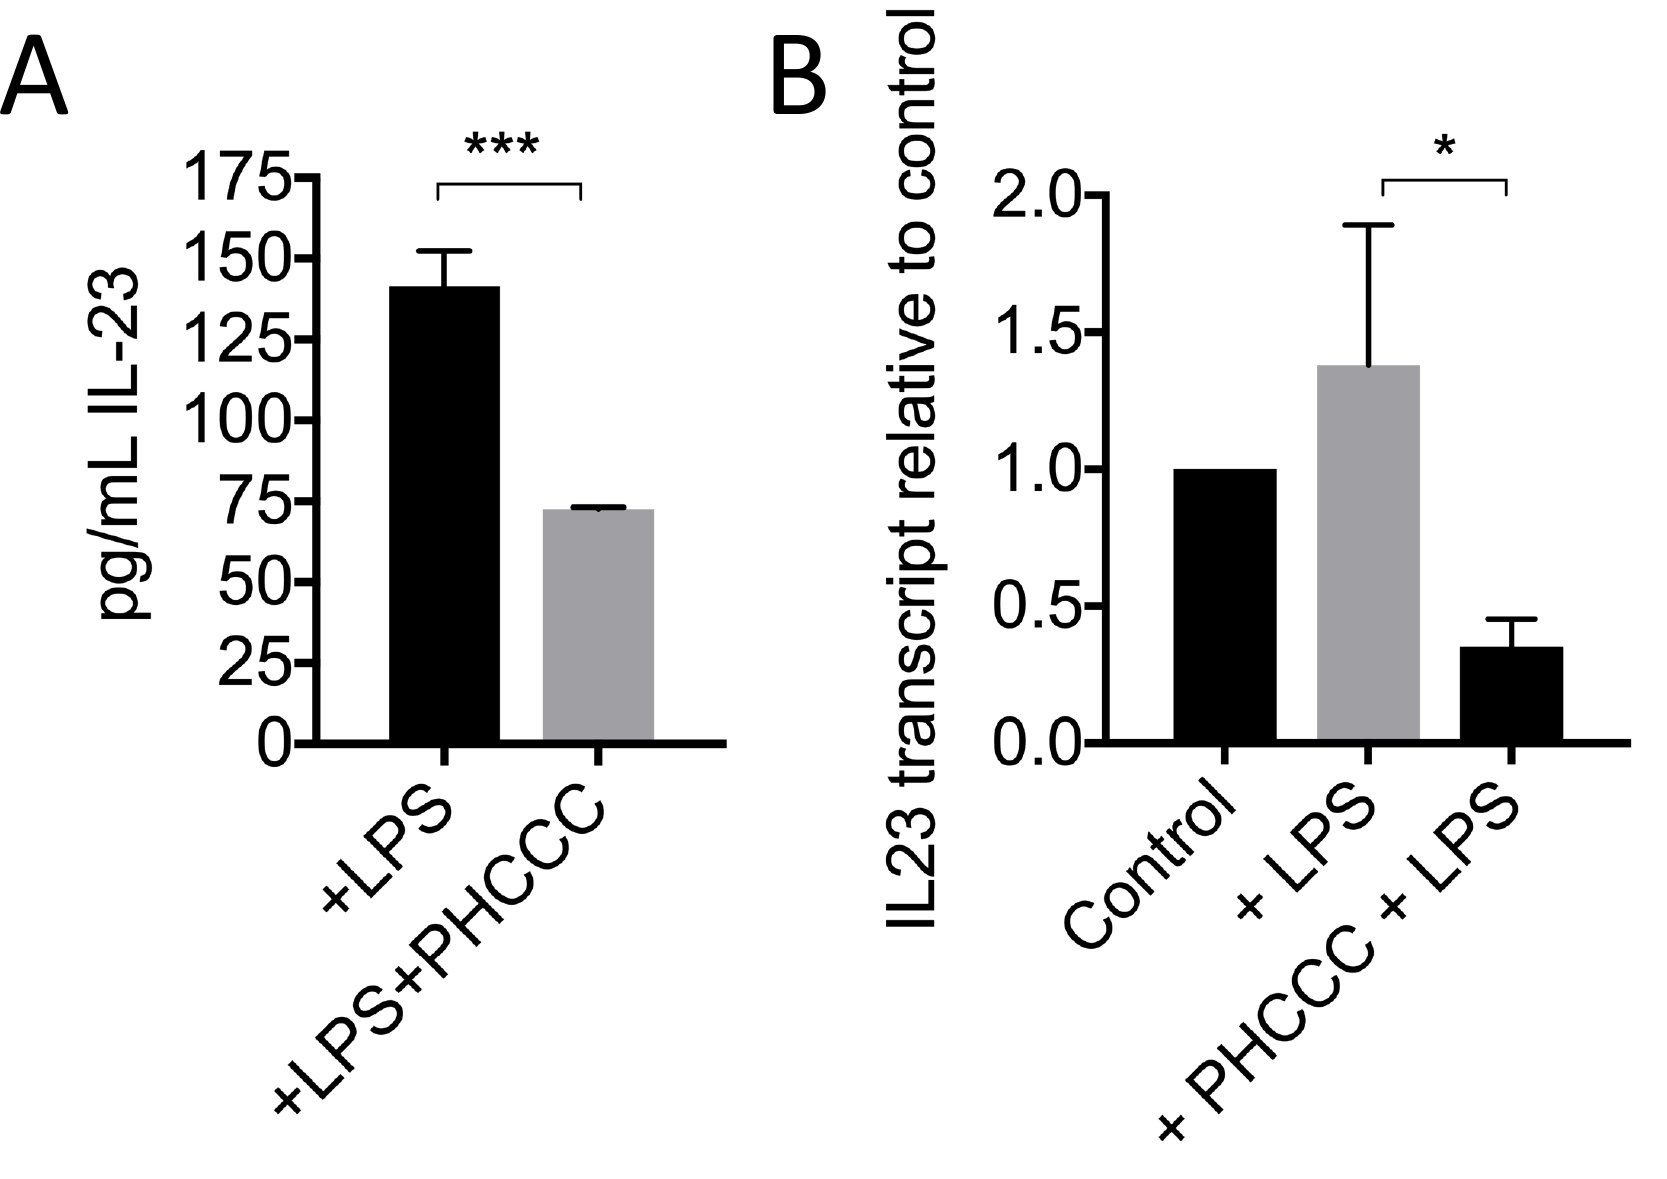


**Fig. S8. GRM4 agonist PHCCC down-regulated IL-23 protein in mouse DCs, and transcript levels in human peripheral blood monocyte derived DCs (PBDC**). **(A)** GRM4 agonist PHCCC inhibits IL23 protein expression in BMDC. BMDC were treated at day 7 with GRM4 agonist PHCCC for 1 hr followed by treatment with LPS at 1 mg/ml. CBA arrays were used to assess IL23 expression (**B)** Human peripheral blood DCs (PBDCs) 1 x 106 cells were differentiated with 50 ng/ml IL4 and GM-CSF for seven days and were treated with PHCCC at 40 mM for 1 hr following exposure to 1 mg/ml LPS for 24 hrs, *IL23* was assessed by qRT-PCR. Triplicates Mean ± SEM, Representative experiments shown.


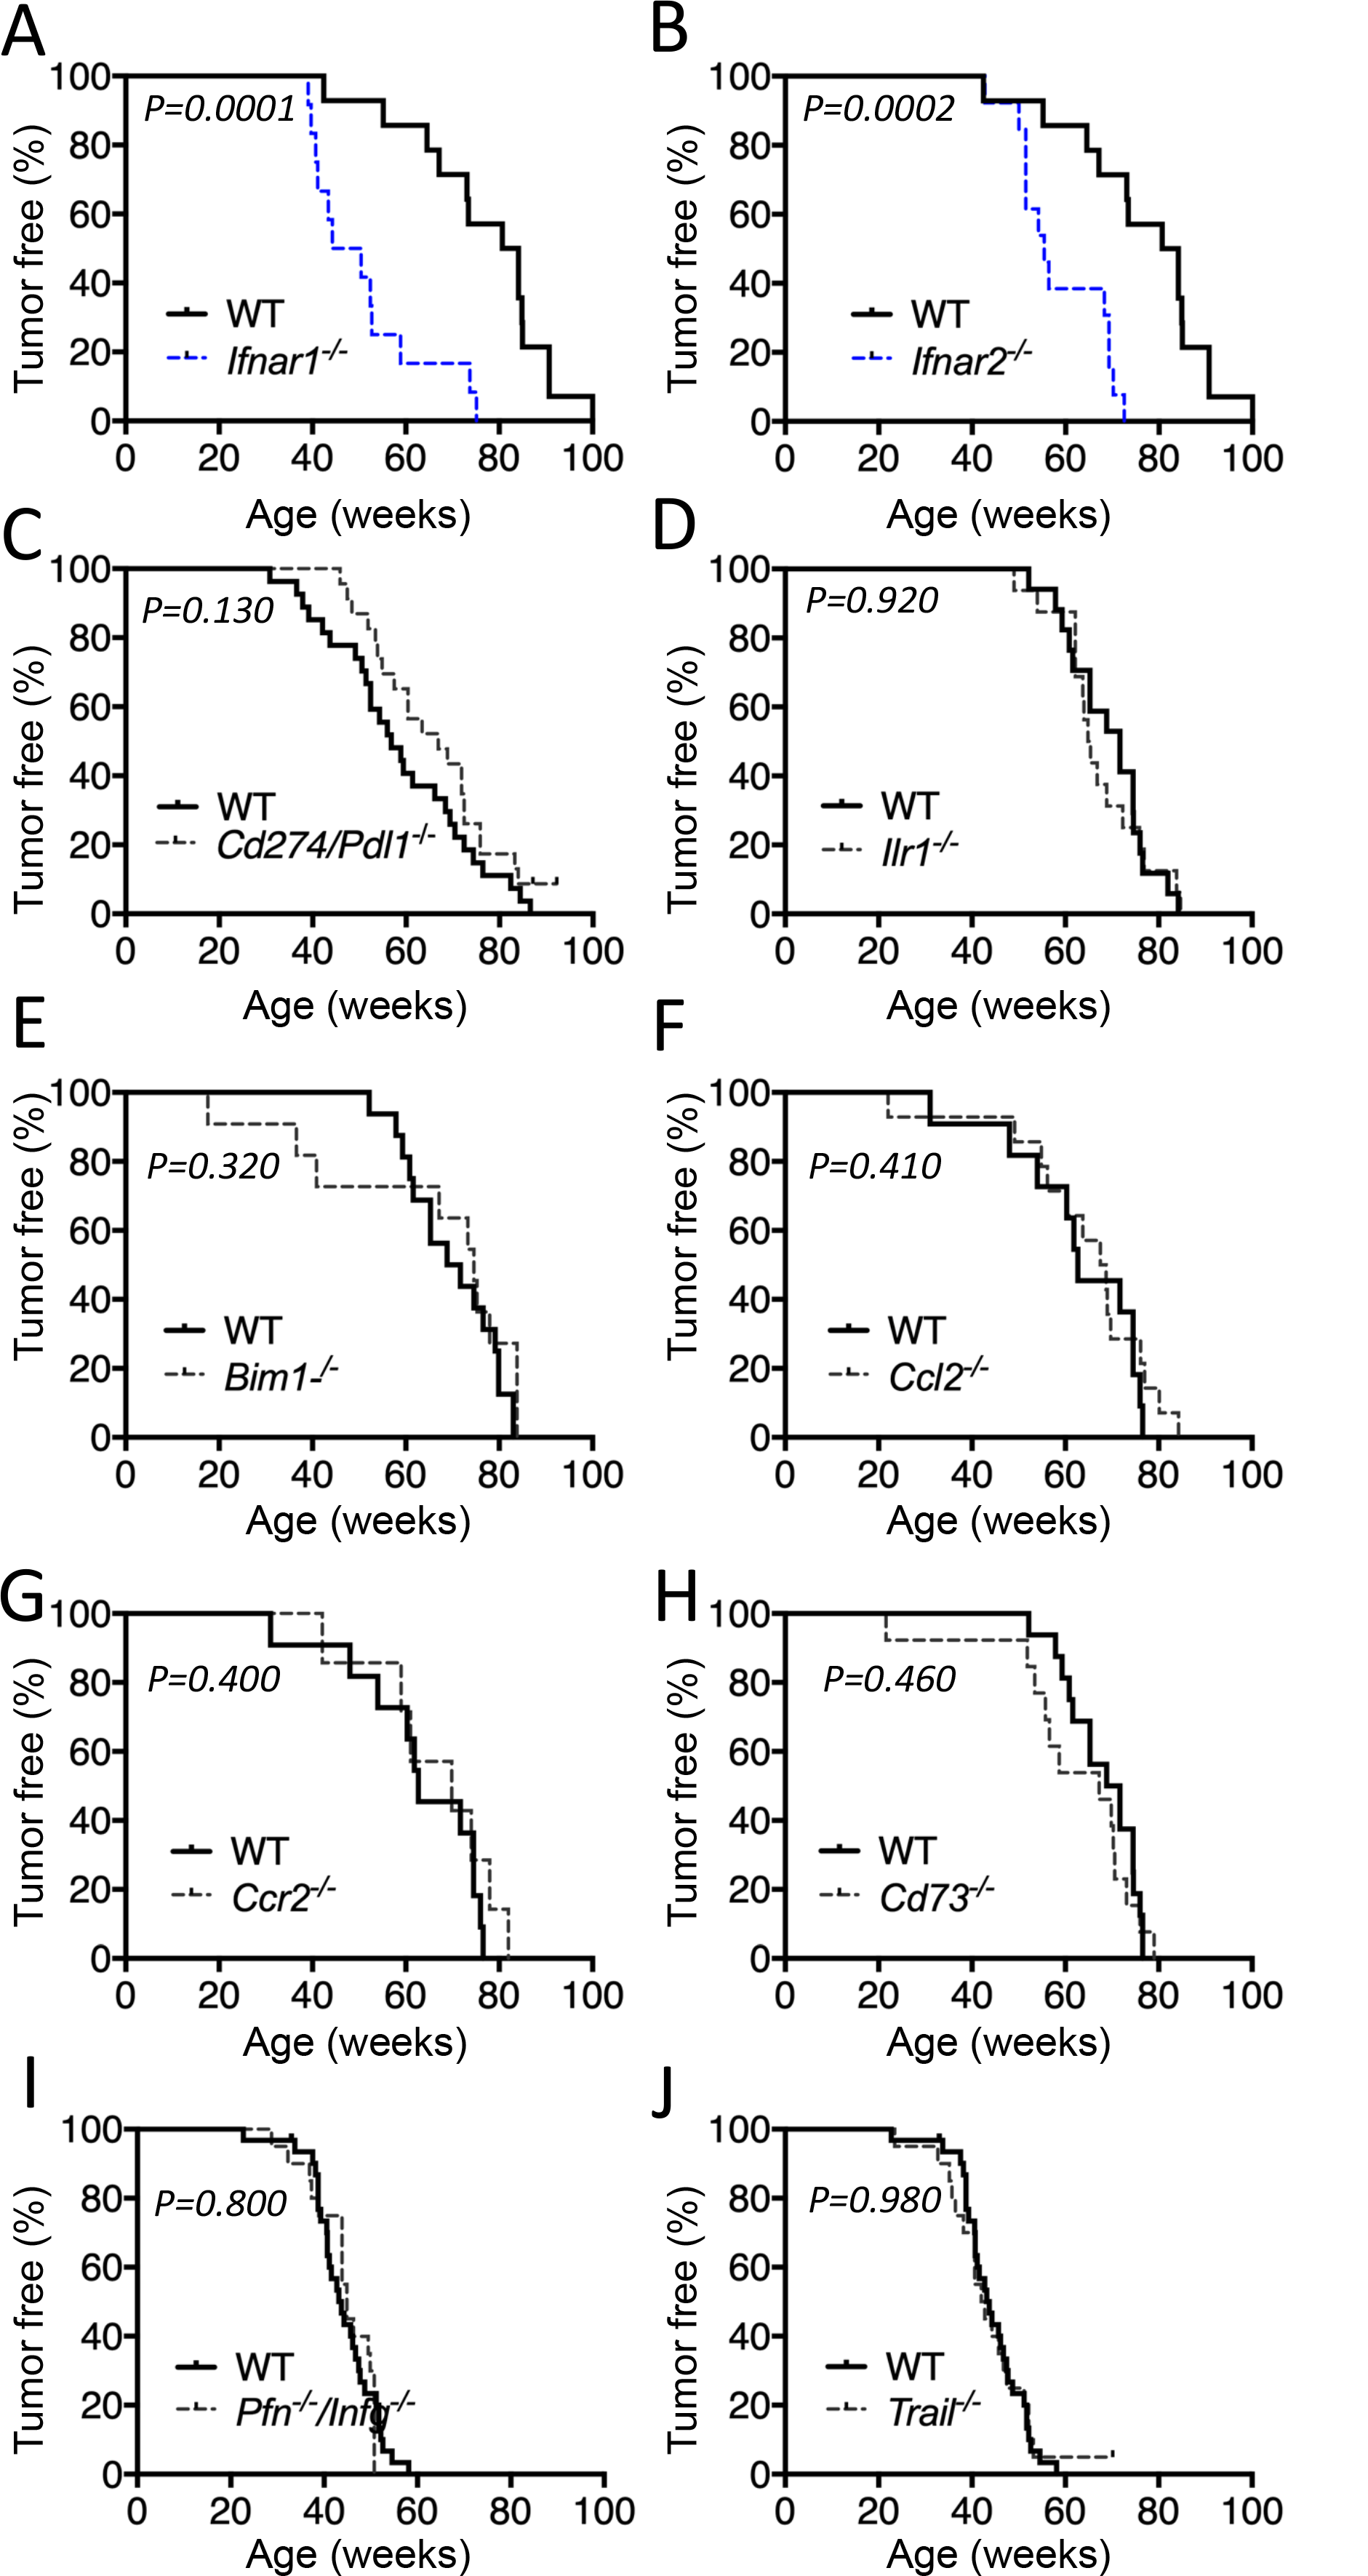


**Fig. S9.** (**A-J**) Kaplan Meier plots of gene-targeted mice versus WT mice. Mice 4-5 weeks of age were injected with 1 uCi/g of calcium 45 once a week for 4 weeks and monitored for tumor growth. *Rb1+/-, Cd1d-/-, IL6-/-* and *J18-/-* were previously published (12). Control WT mice and genetically modified littermate were matched for sex and age. Historically median survival of WT male mice is ~73 weeks vs 46 weeks for female mice.

**
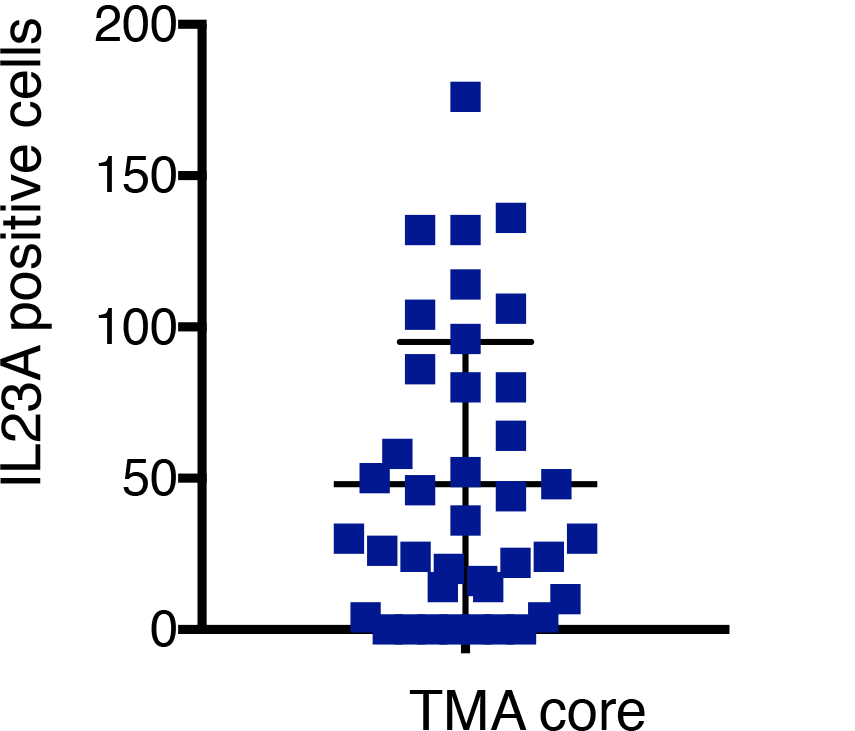
**

**Fig. S10 Human osteosarcomas express IL23**. (A) Summary of IL23A expression by ISH in tumor microarrays (US Biomax, Rockville, MD, USA), (40 patient tumors in duplicate) compared to normal bone (10 samples in duplicate). 1500 mm cores (*n=40)* in duplicate were assessed for positive staining cells in whole core, quantitation of positive cells per core. Cells were stained using ACD Bio probes and kits.

**
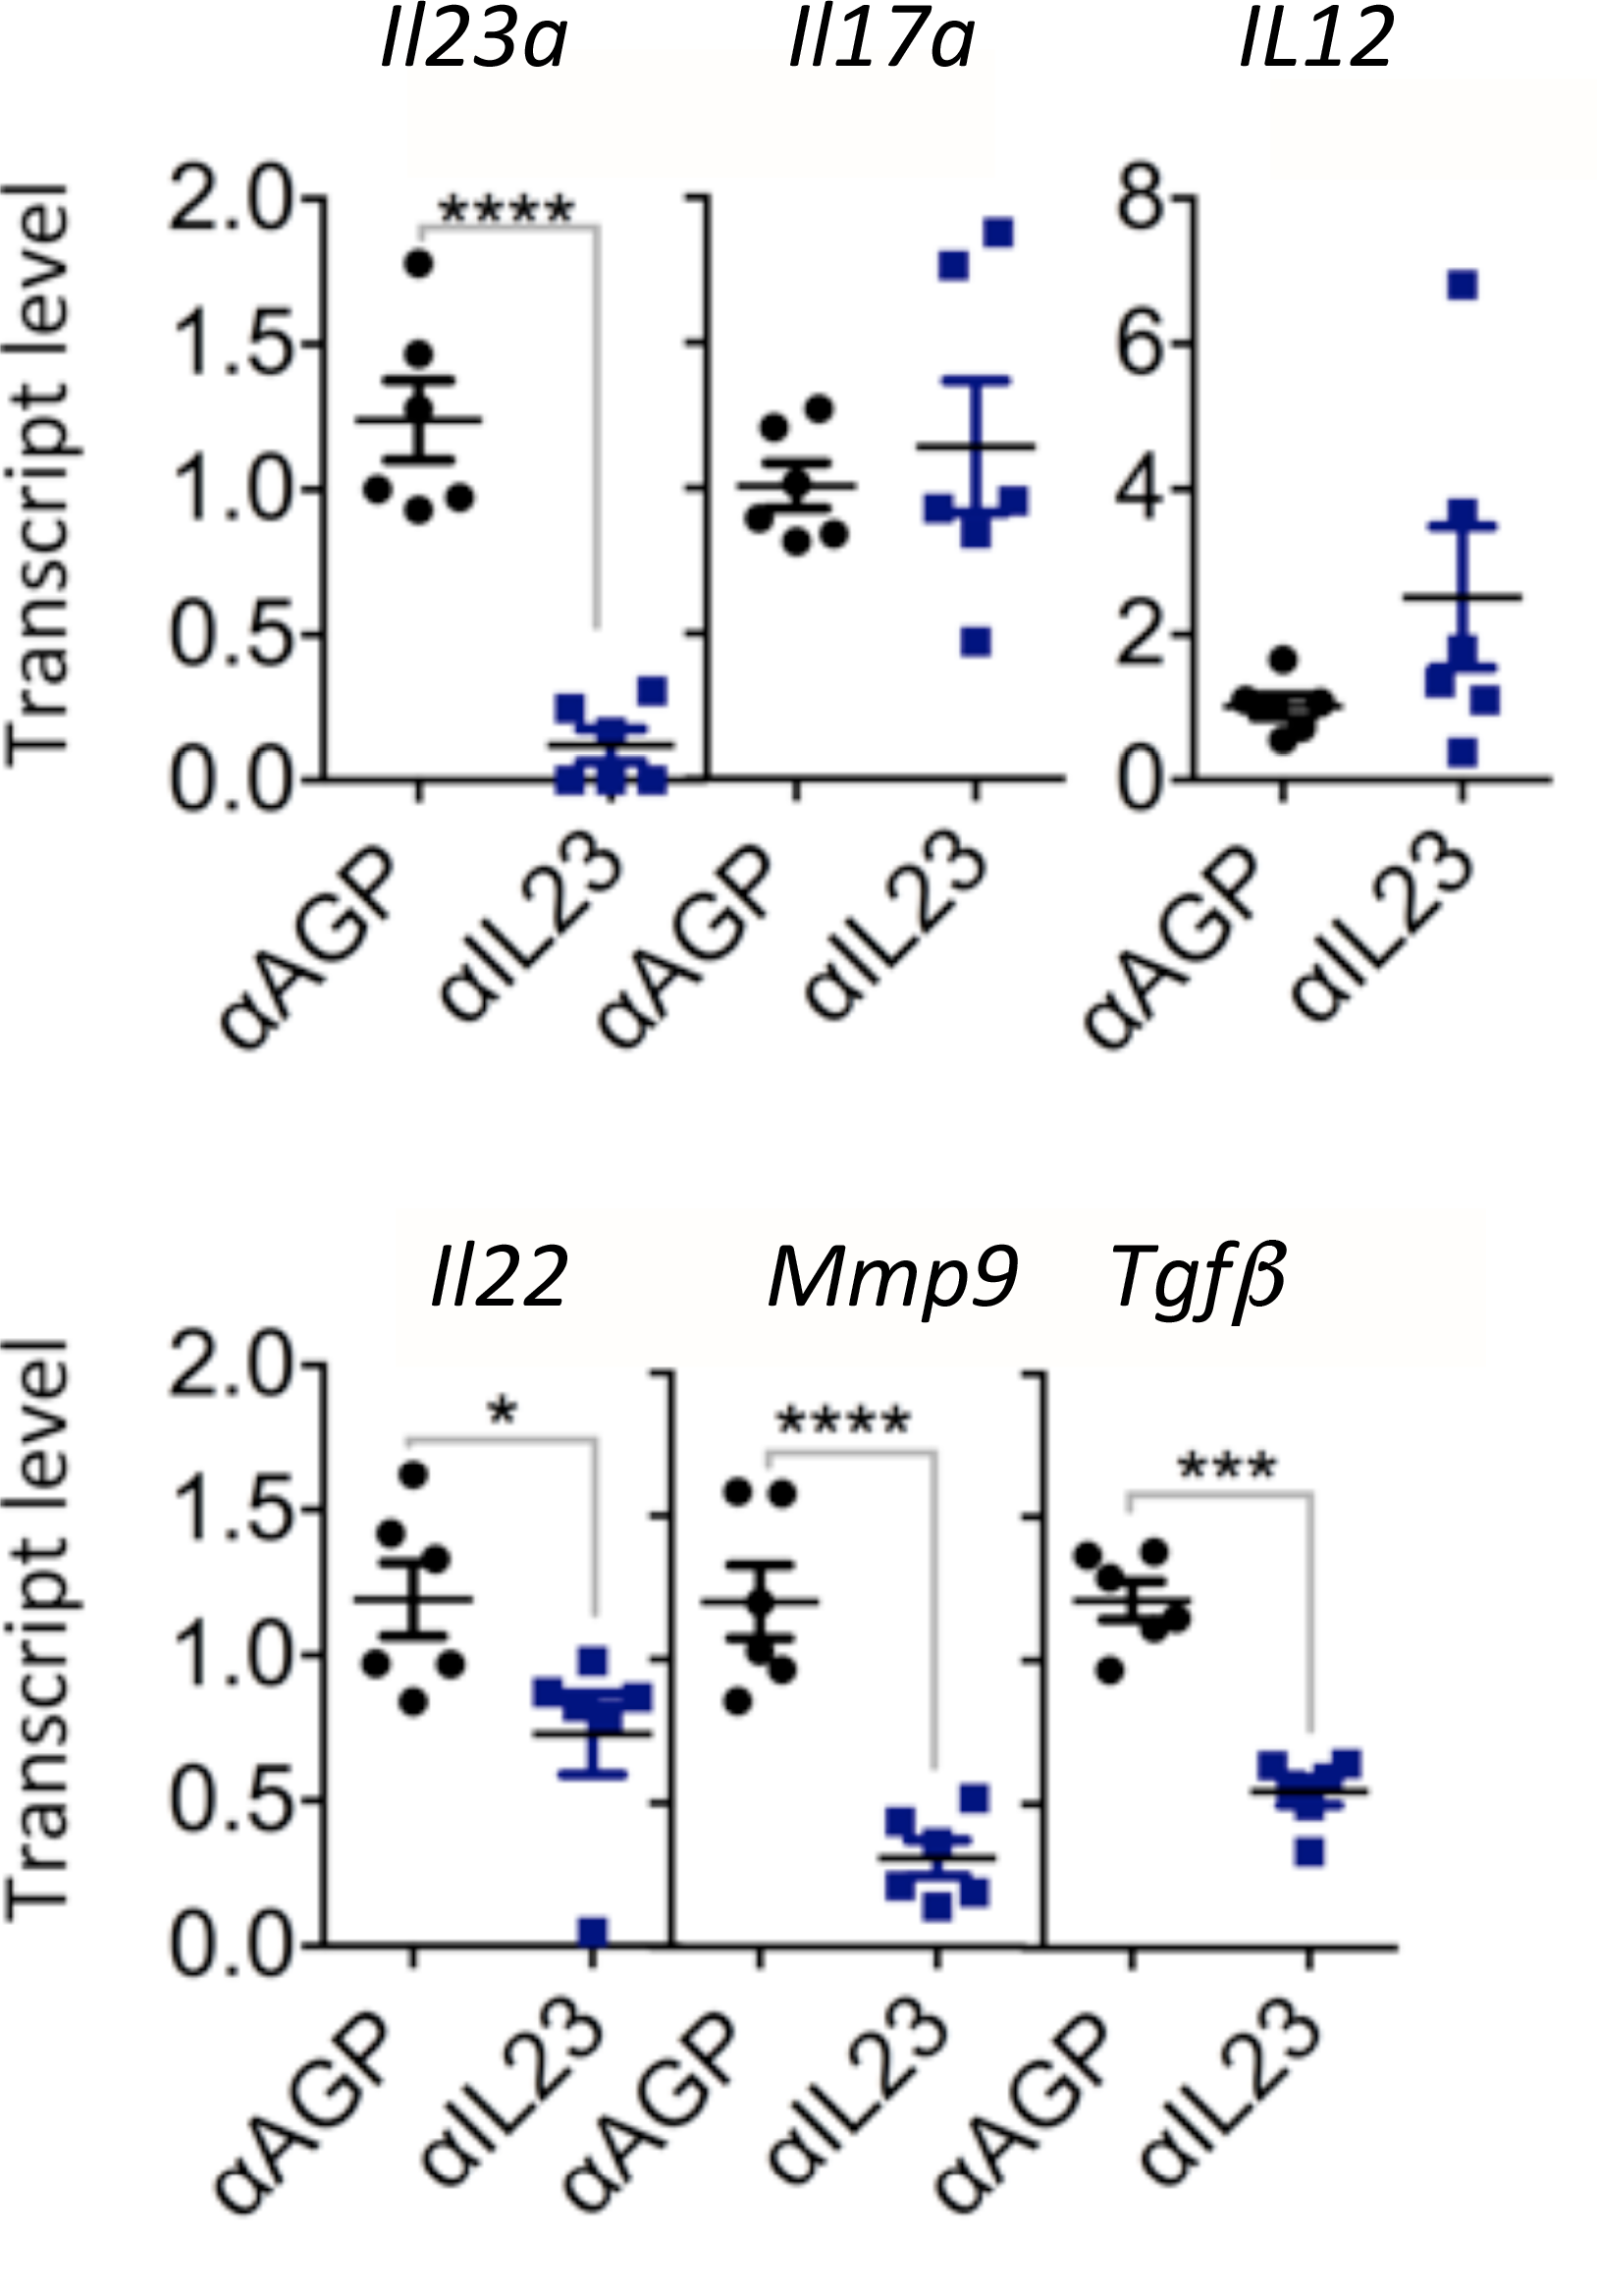
**

**Fig. S11. Antibody blocking antibody IL23 suppresses known IL23 targets within tumors.** C57BL/6 mice were injected s.c in the flank of the leg with osteosarcoma cell line 1 x 106 OS18. Mice were divided onto cohorts and treated with aAGP3 or aIL-23 or 500 µg/mouse days 1, 3, 5, 7, 9, 12, 16, 21. In the tumor IL23 neutralizing antibody significantly down regulated the transcript level *Il23a* (P*<0.0001****) and downstream targets *Il22* (*P=0.0331*), *Mmp9* (*P<0.0001*) and *Tgf*(P<0.0001). Transcript normalised to house keeping genes *Rsp27a and Actb*.


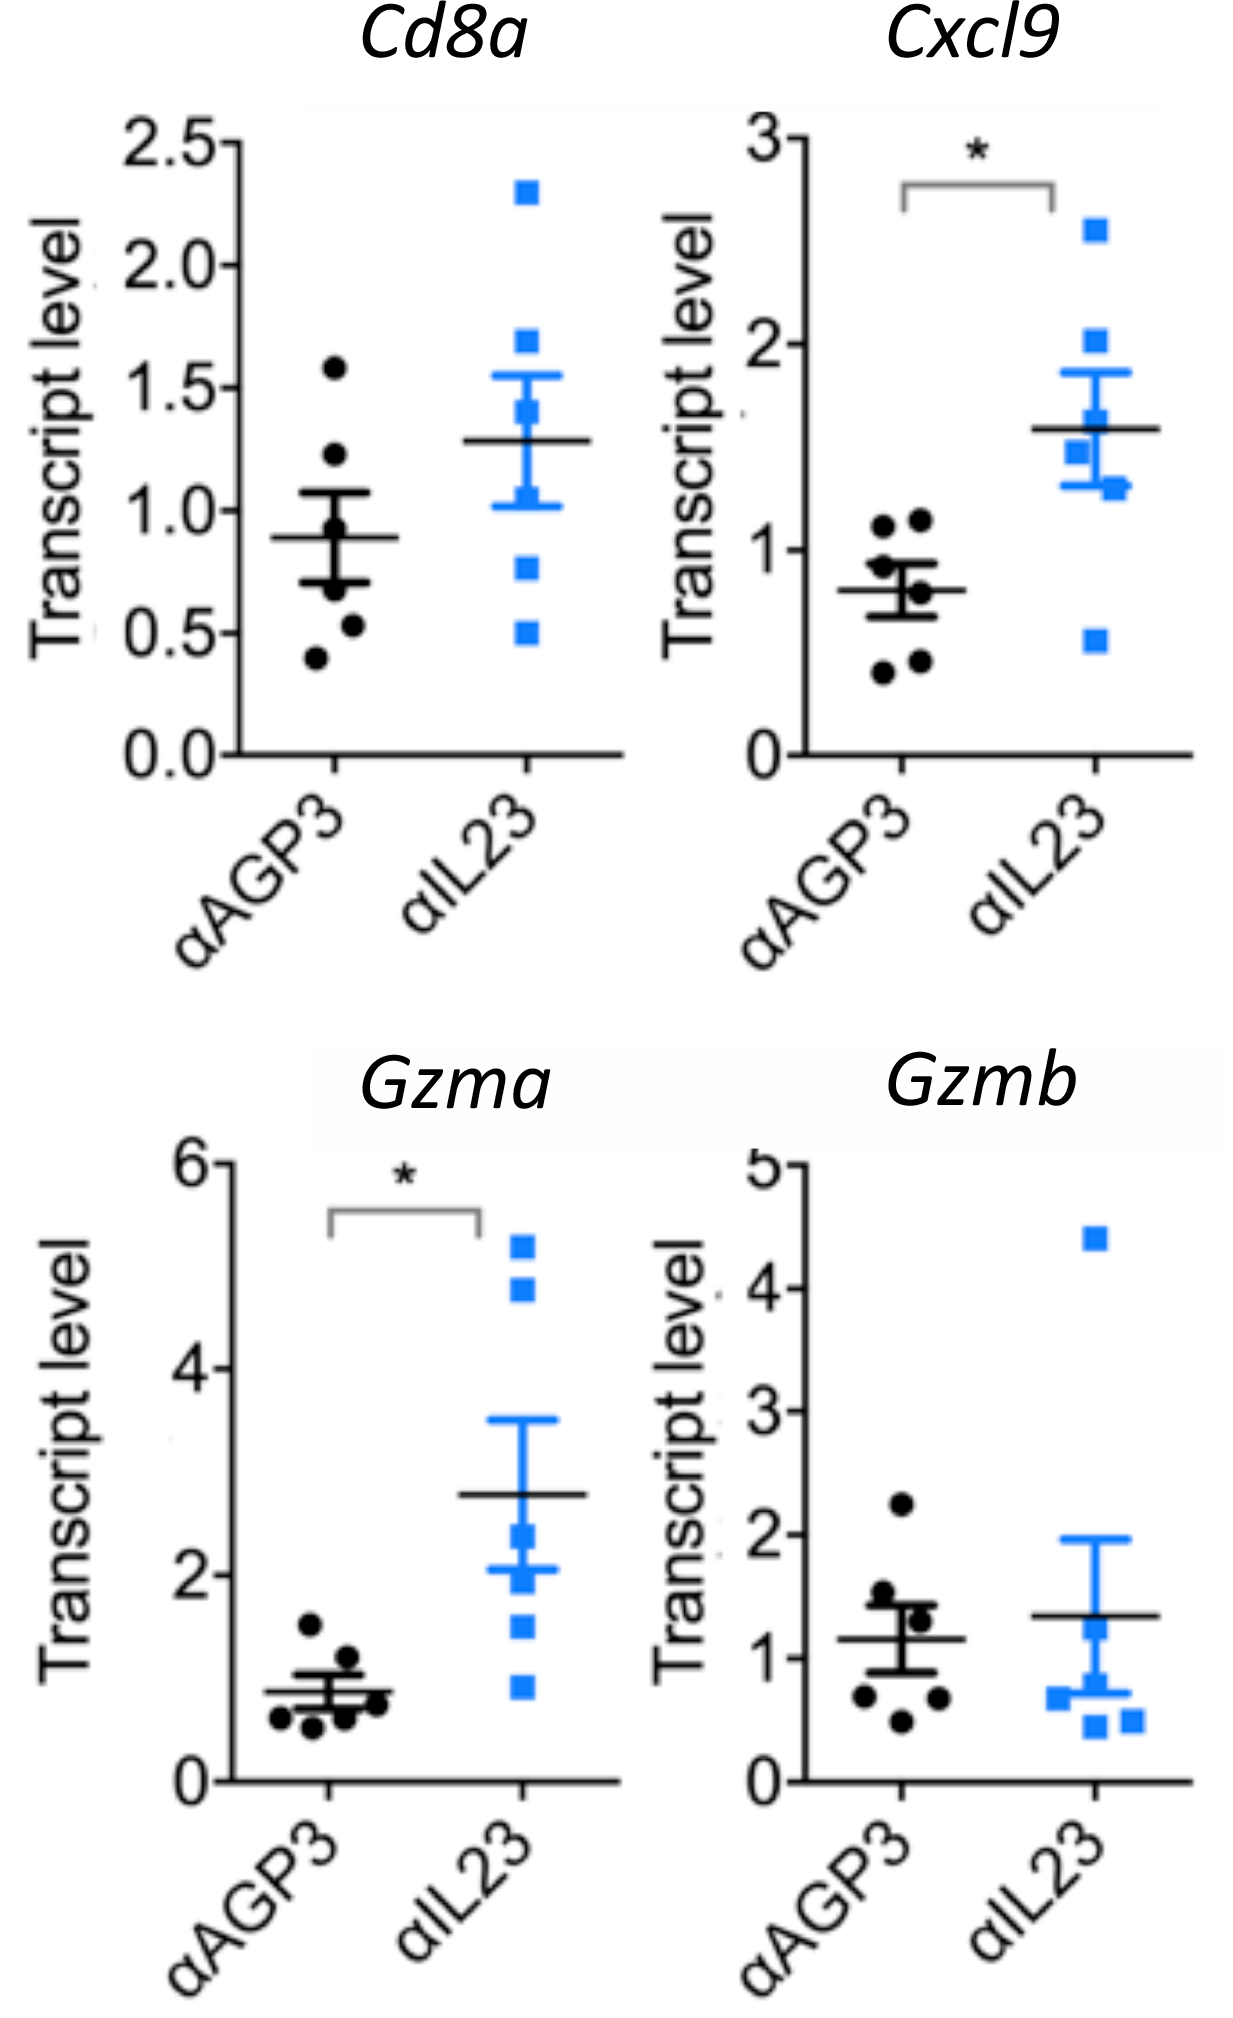


**Fig. S12. Antibody blocking antibody IL23 increases markers of T-cell activation in the tumor microenvironment.** Transcript levels were assessed using RT-PCR from tumor tissue treated with haIL23 or control AGP3 antibodies. We also examined several markers of cytotoxic T-cell activity including CD8a molecule (*Cd8a*), Chemokine (C-X-C) ligand 9 (Cxcl9), Eomesodermin homolog (*Eomes*), Granzyme A & B (*Gzma, Gzmb*), Interferon beta 1 (*Ifnb1*), Perforin (*Pfr1)* and Tumor Necrosis Factor a (*Tnf)* in tumors treated with IL23E16 compared to control AGP3-treated cells. Preliminary studies show a significant increase in *Gzma* (*P=0.0279**) and *Cxcl9* (*P=0.0278**) (*n=6*) following treatment with IL23 compared to control antibody. .

**
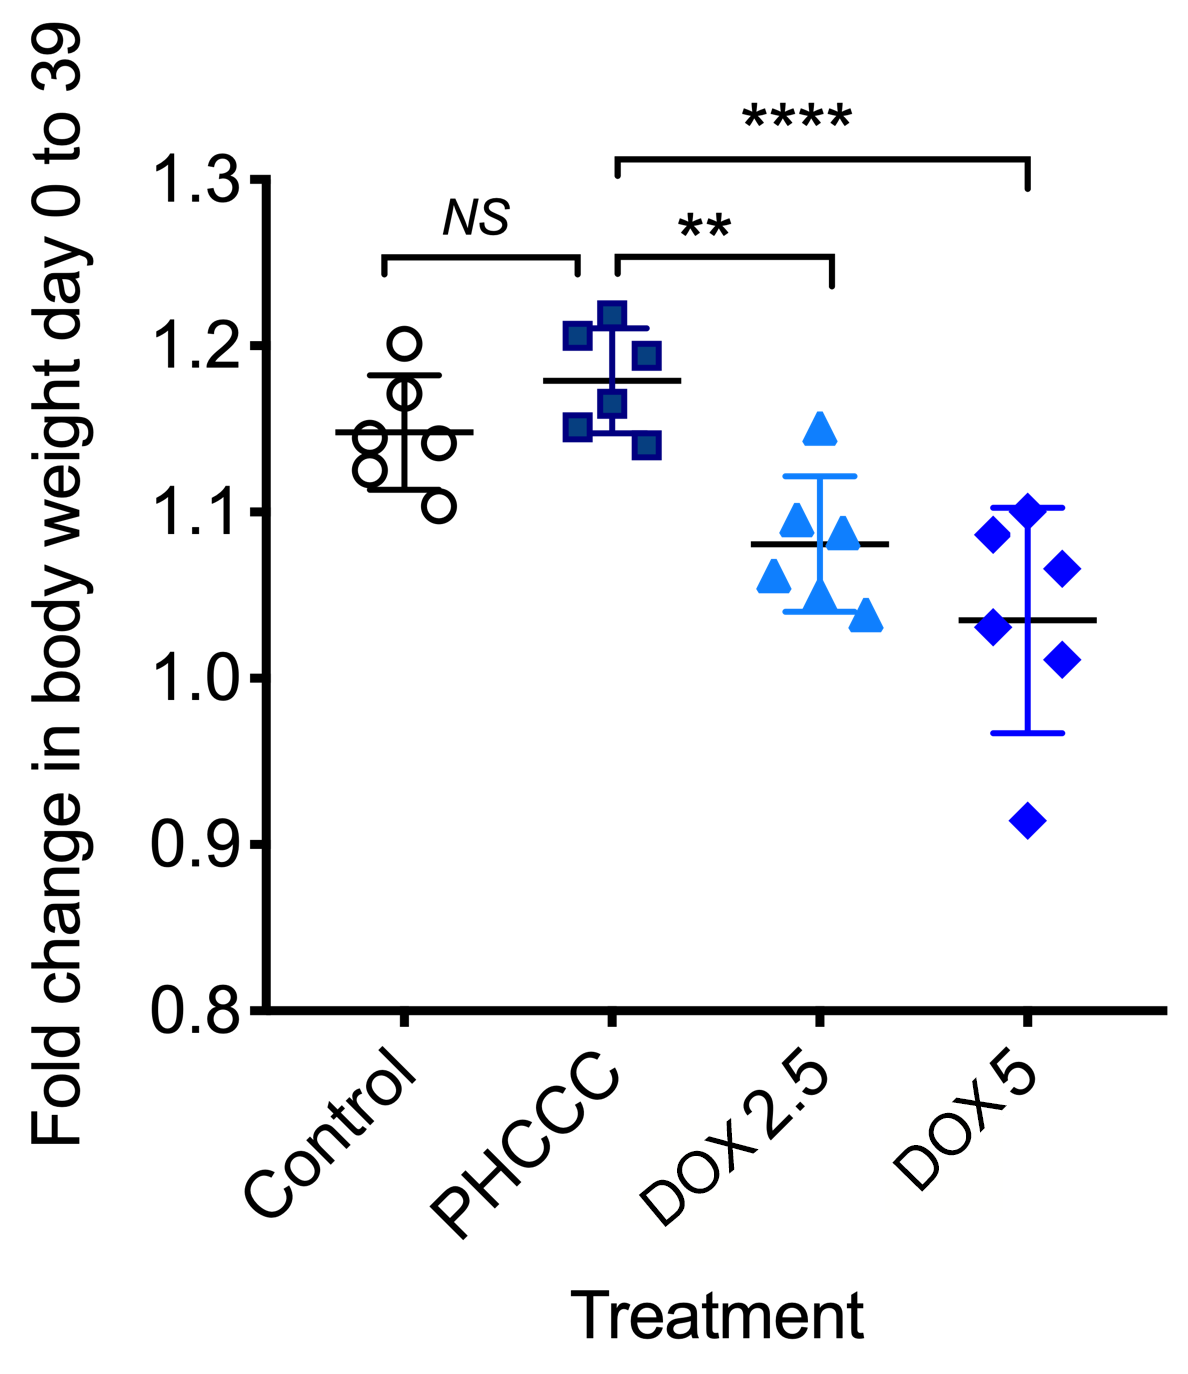
**

**Fig. S13 Fold-change in body weights of mice treated with PHCCC or Doxorubicin from day 0 to last day of treatment day 39. (*n=6* mice per cohort).**


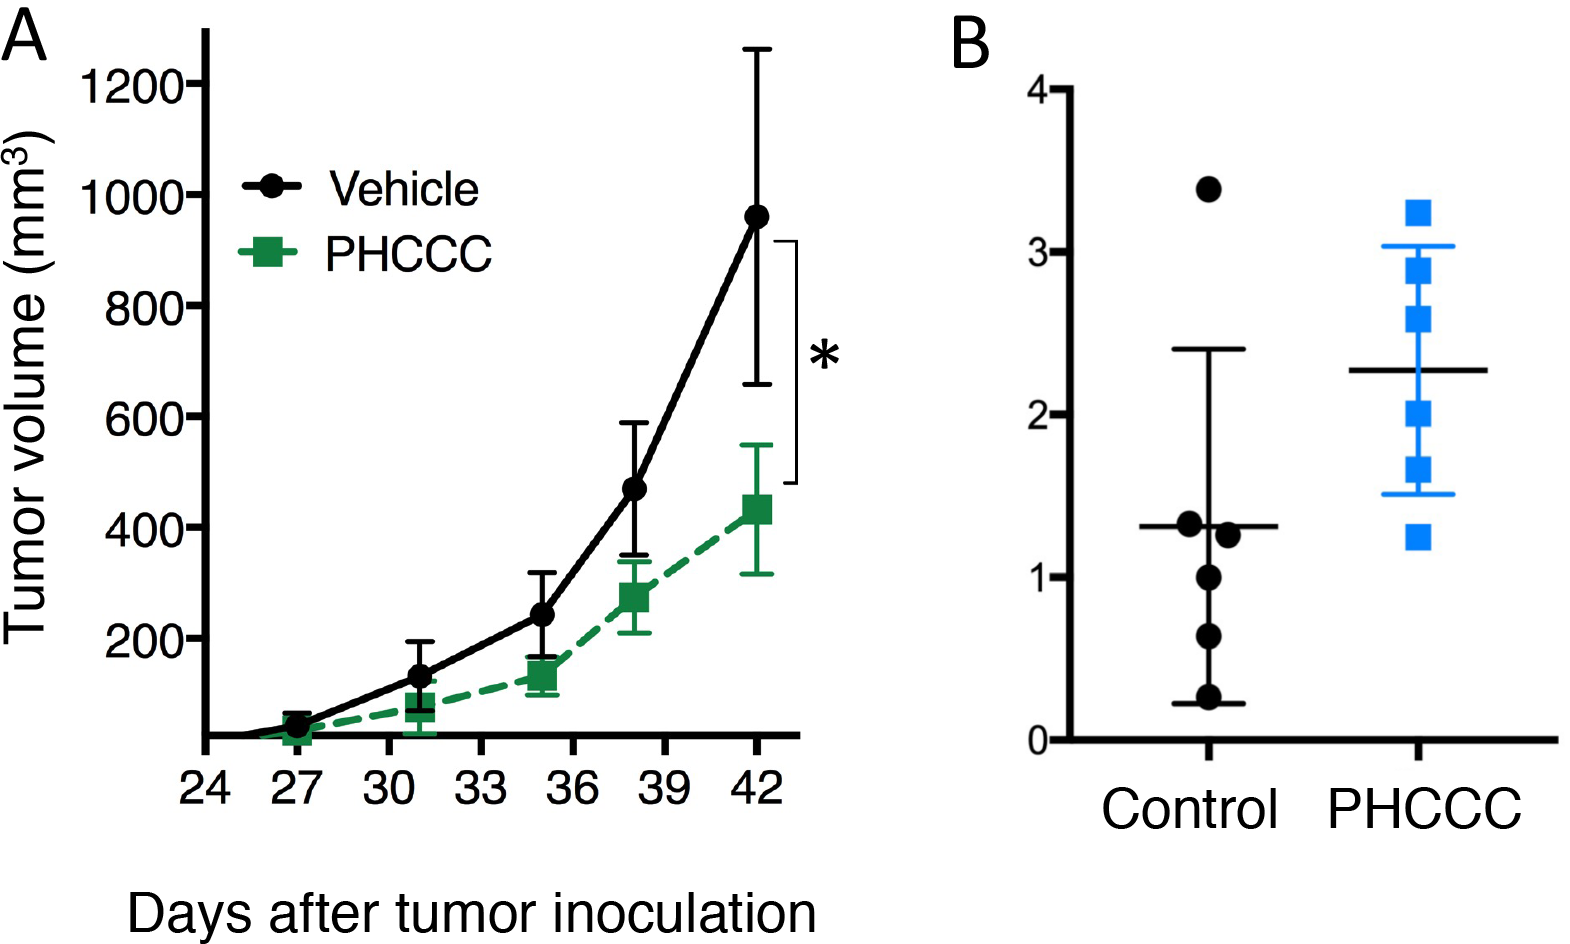


**Fig. S14. (A)** In an independent experimentmice 6 per cohort, were treated with 7 doses of PHCCC 10 mg/Kg in 20% DMSO or vehicle alone, once every second day (seven doses in total) (starting day 28) i.p. (B) Evaluable tumors were assessed for *Il12* transcript following treatment. Tumors treated with PHCCC show a trend towards increased expression of *Il12* in the tumor microenvironment. Transcript normalized to house keeping genes.


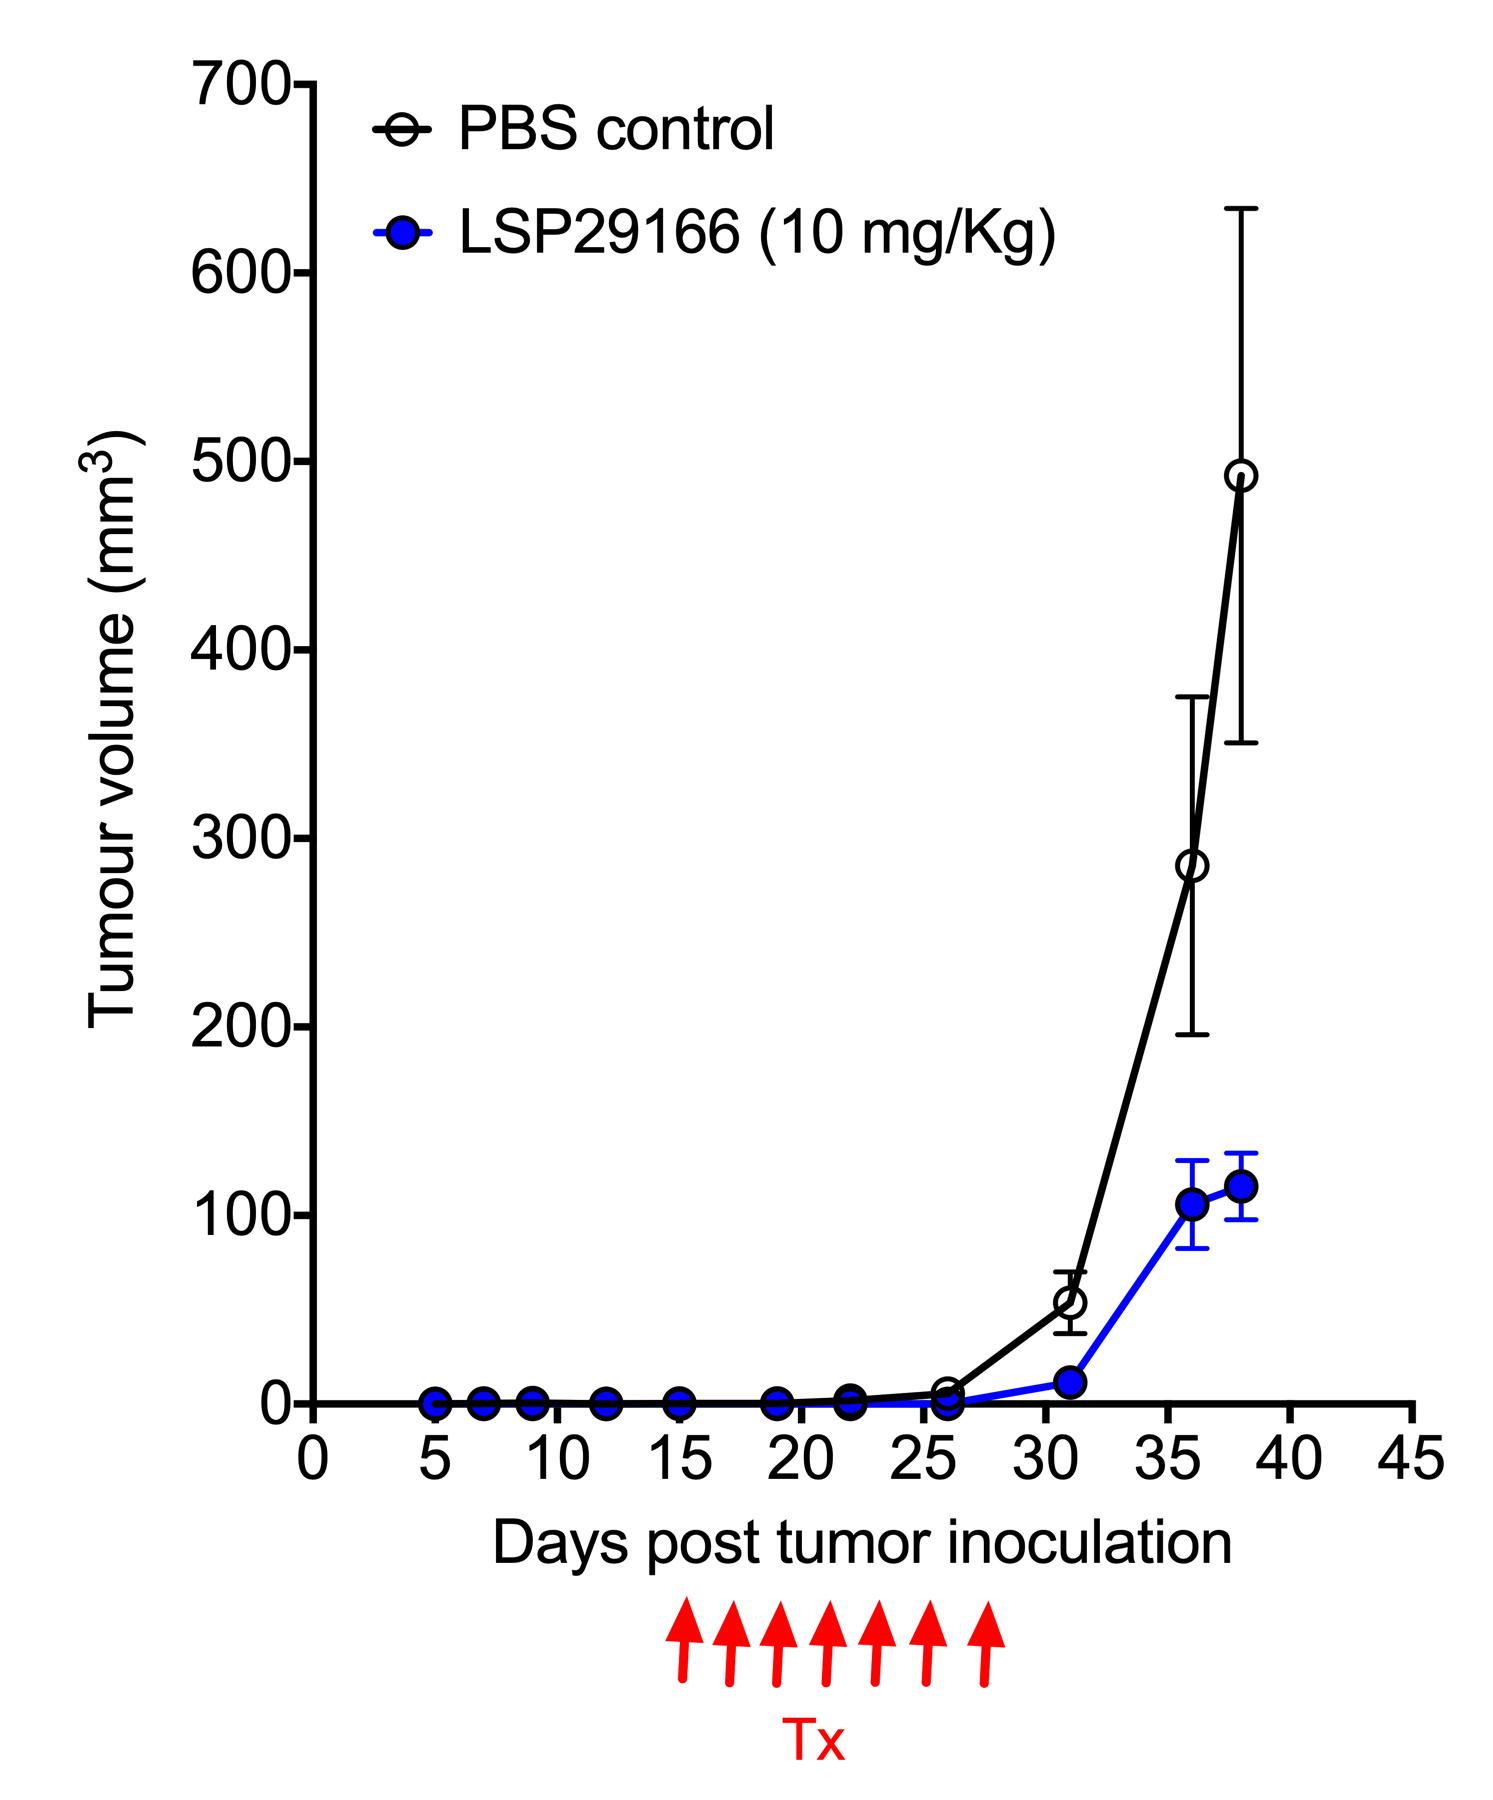


**Fig. S15. GRM4 agonist LSP2-9166 suppresses the growth of osteosarcoma**. The Wilcoxon matched test was used to determine statistical significance of difference between treatment groups (*P*=0.0010). Five mice per cohort were treated with vehicle PBS or LSP2-9166 (10 mg/Kg) day 15, 17, 19, 21, 23, 25 and 27 i.p.


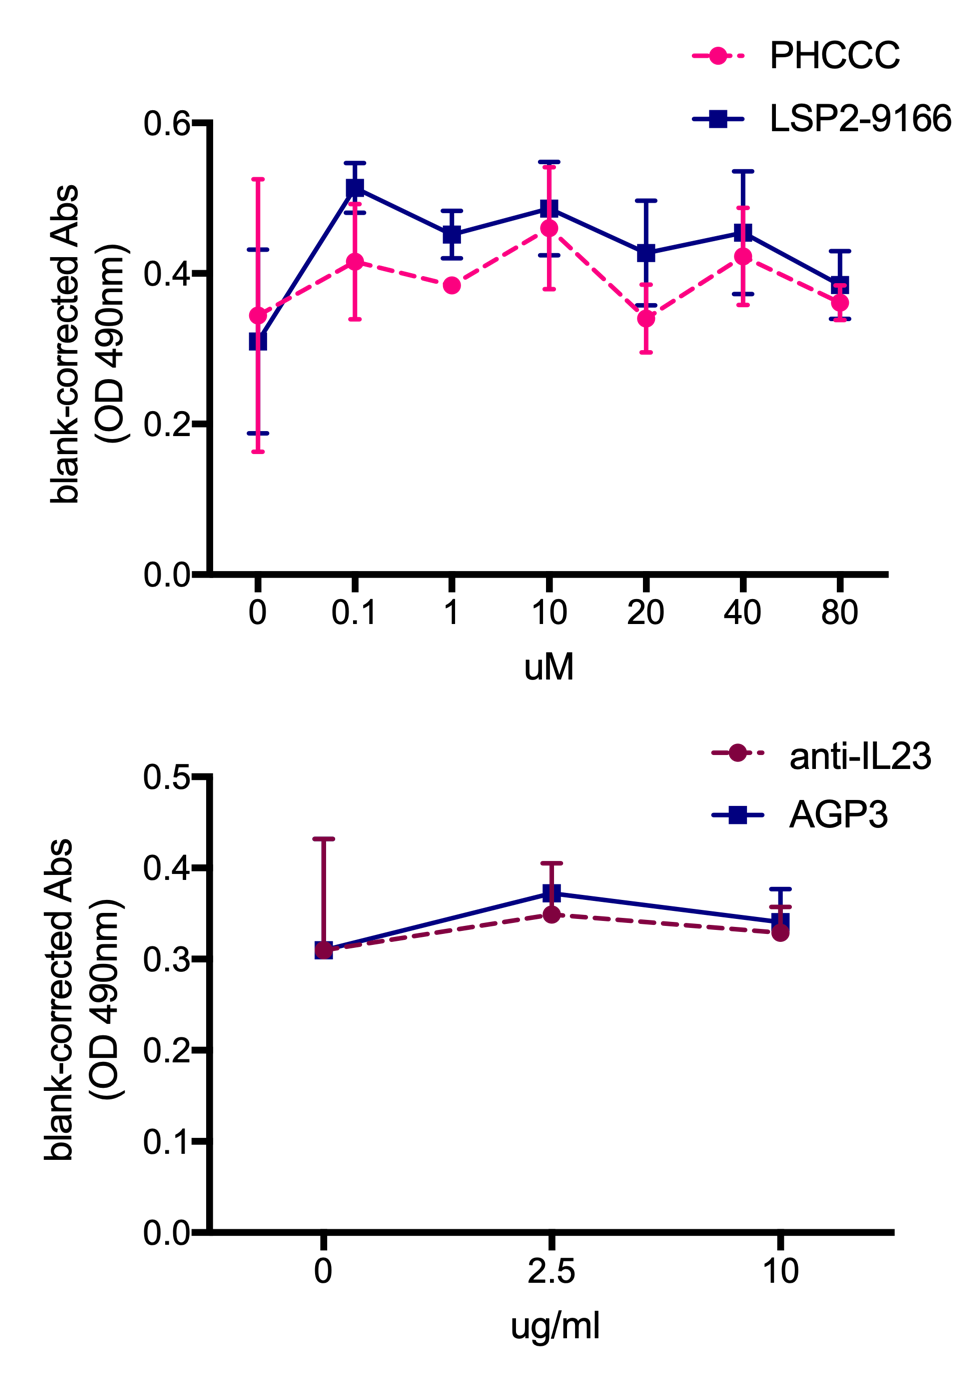


**Fig. S16. Treatment of osteosarcoma cells in vitro with GRM4 agonists or IL23 blocking antibody had little effect on proliferation/ viability as assessed by MTS assay.** OS18 cells were plated at 2 x 104/96 well plate and treated with drugs at concentrations shown on graphs for 24 hrs and MTS assay carried. CellTiter 96 Aqueous One solution Cell proliferation Assay (Promega) was used (20ul for 1 hr) to assess cells.

**Table S1.**

Table. S1 Antibody panel for Flow Cytometry

Table S2.


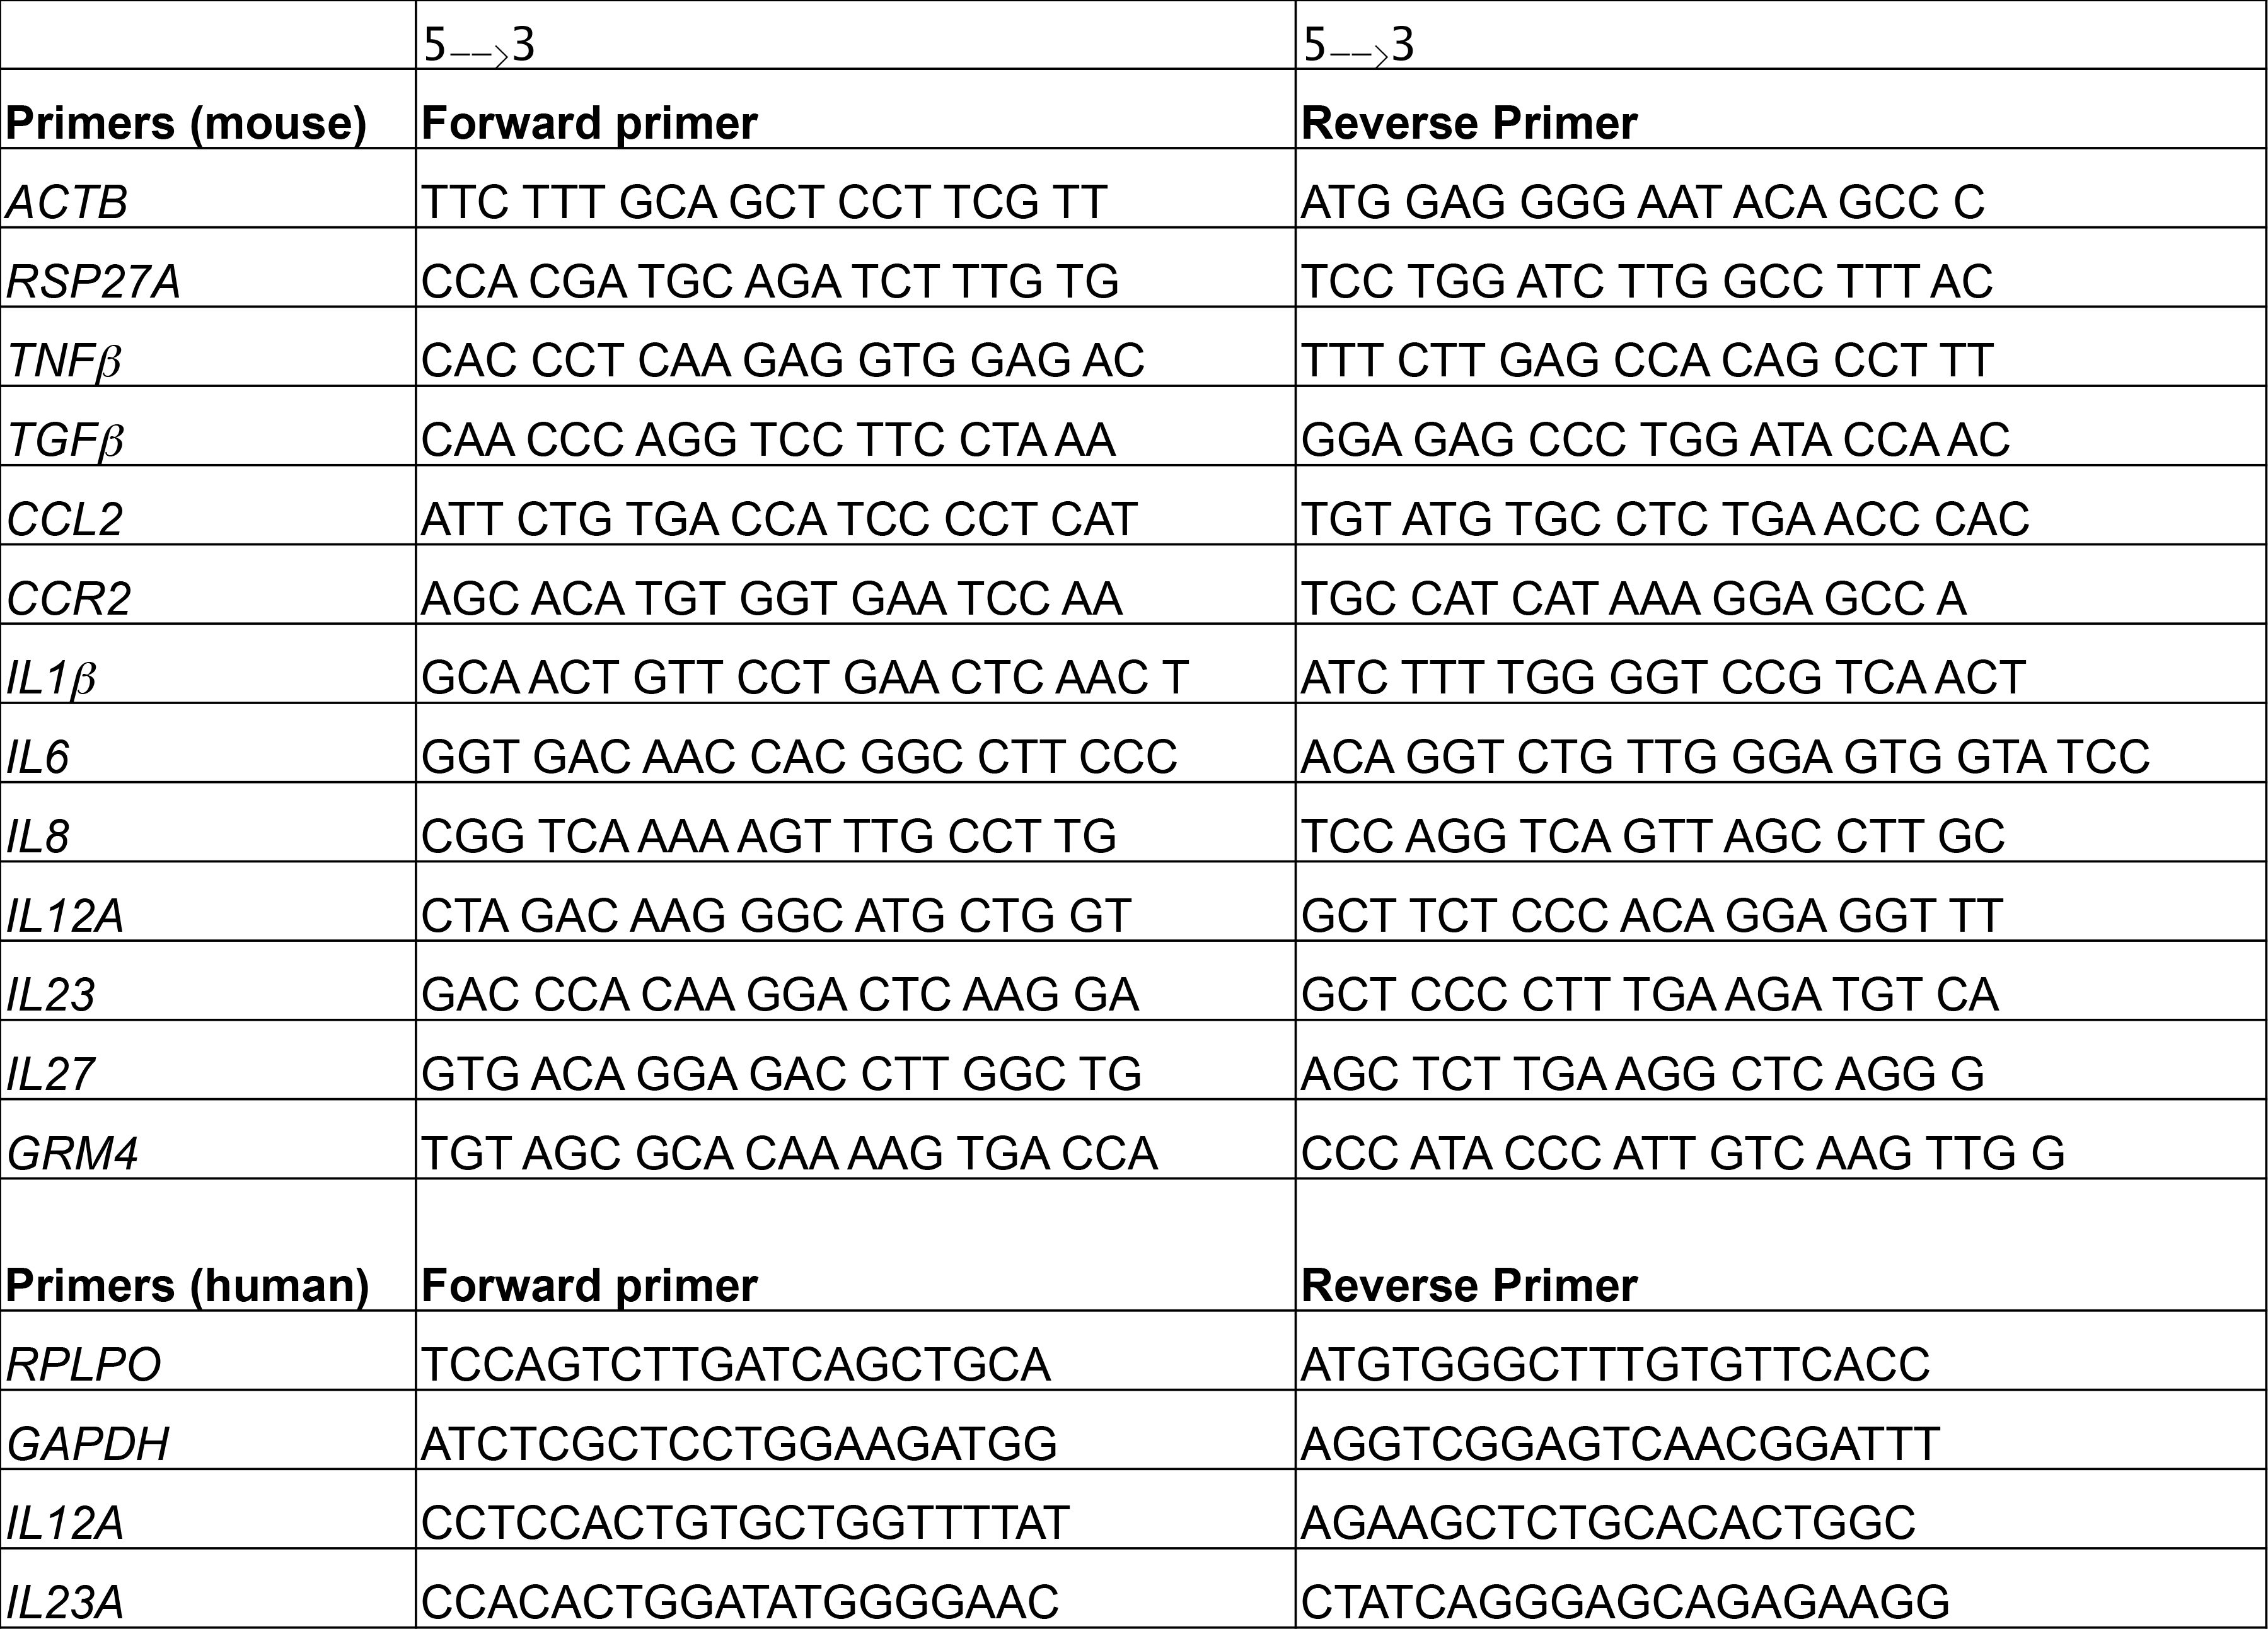


Table S2. Primer sequences for quantitative real-time PCR. Primer sequences were taken from Primer depot or Primer bank (https://pga.mgh.harvard.edu/primerbank/)
